# Supplementary material for: The epigenetic processes of meiosis in male mice are broadly affected by the widely used herbicide atrazine
Source: BMC Genomics. 2015 Oct 30;16:885. doi: 10.1186/s12864-015-2095-y (PMC4628360; doi:10.1186/s12864-015-2095-y)
Supplement: Supplementary file 1 — Supplementary material. (PDF 2459 kb) [file 12864_2015_2095_MOESM1_ESM.pdf]

Table S1

Differentially expressed genes in ATZ treated testes, cut-off value  $\geq 2$ 

| Gene Name            | FC  | Gene full name/ function                                                                                                       |
|----------------------|-----|--------------------------------------------------------------------------------------------------------------------------------|
| <i>Entpd4</i>        | 0.4 | Ectonucleoside triphosphate diphosphohydrolase 4, role in salvaging of nucleotides, localizes to lysosomal/autophagic vacuoles |
| <i>Kif18b</i>        | 0.5 | Kinesin family member 18B, role in spindle formation during mitosis                                                            |
| <i>9230104L09Rik</i> | 0.5 | RIKEN cDNA 9230104L09 gene, cysteine proteinase inhibitor                                                                      |
| <i>ND6</i>           | 2.3 | NADH dehydrogenase subunit 6, oxidative phosphorylation Complex I                                                              |
| <i>Acsm2</i>         | 2.1 | Acyl-CoA synthetase medium-chain family member 2, xenobiotic/medium-chain fatty acid:CoA ligase                                |
| <i>Speer7-ps1</i>    | 2.1 | Spermatogenesis associated glutamate (E)-rich protein 7, pseudogene 1                                                          |
| <i>Speer4e</i>       | 2.0 | Spermatogenesis associated glutamate (E)-rich protein 4e                                                                       |
| <i>Xpo7</i>          | 2.0 | Exportin 7, Ran GTPase binding, nuclear transport receptor                                                                     |
| <i>Gm17019</i>       | 2.1 | Predicted gene 17019                                                                                                           |

Table S2

Differential H3K4me3 peaks, cut-off value  $\geq 2$ 

| chr   | start     | end       | FC  | Nearest genes        | Function                                                                                                                                                                                                                        |
|-------|-----------|-----------|-----|----------------------|---------------------------------------------------------------------------------------------------------------------------------------------------------------------------------------------------------------------------------|
| chr1  | 13214621  | 13215994  | 0.2 | <i>Ncoa2</i>         | Gene encodes nuclear receptor coactivator 2, which aids in the function of nuclear hormone receptors, gene is essential for mouse reproductive function                                                                         |
| chr14 | 69909210  | 69910543  | 0.3 | <i>Synb</i>          | The protein plays a major role in placental development and trophoblast fusion and essential for reproduction                                                                                                                   |
| chr14 | 69943852  | 69944785  | 0.4 | <i>Entpd4</i>        | This gene encodes a member of the apyrase protein family, which may play a role in salvaging nucleotides from lysosomes and contribute cell death                                                                               |
| chr15 | 36579531  | 36580059  | 0.5 | <i>Pabpc1</i>        | Pabpc1 protein may plays role in translational regulation of gene expression during spermatogenesis                                                                                                                             |
| chr16 | 65839556  | 65839983  | 0.5 | <i>Vgll3</i>         | Vgll3 expression is associated with a tumor suppressor phenotype in epithelial ovarian cancer, plays role in transcription regulation                                                                                           |
| chr16 | 34657682  | 34658027  | 0.5 | <i>Ropn1</i>         | Ropporin, a sperm-specific binding protein of rhophilin, that is localized in the fibrous sheath of sperm flagella                                                                                                              |
| chr14 | 70008610  | 70009670  | 0.5 | <i>Loxl2*</i>        | This gene encodes a member of the lysyl oxidase gene family, cell growth control. LOXL2 promotes tumor progression possibly by activating multiple signal pathways, oxidoreductase                                              |
| chr10 | 69070299  | 69070962  | 0.5 | <i>Ank3*</i>         | Ankyrins play key roles in activities such as cell motility, activation, proliferation, contact, and the maintenance of specialized membrane domains                                                                            |
| chr19 | 25724428  | 25725066  | 0.5 | <i>2610016A17Rik</i> | RIKEN cDNA 2610016A17 gene                                                                                                                                                                                                      |
| chr5  | 15217817  | 15218108  | 6.2 | <i>Speer7-ps1</i>    | Spermatogenesis associated glutamate (E)-rich protein 4C, opposite strand transcript                                                                                                                                            |
| chr5  | 14936867  | 14937118  | 6.0 | <i>Speer4e</i>       | Spermatogenesis associated glutamate (E)-rich protein 4e                                                                                                                                                                        |
| chr5  | 14977994  | 14978281  | 5.7 | <i>Speer8-ps1</i>    | Spermatogenesis associated glutamate (E)-rich protein 8, pseudogene 2                                                                                                                                                           |
| chr5  | 14978623  | 14978993  | 4.8 | <i>Speer8-ps1</i>    | Spermatogenesis associated glutamate (E)-rich protein 8, pseudogene 1                                                                                                                                                           |
| chr13 | 120278317 | 120279418 | 4.1 | <i>Gm7120</i>        | predicted gene 7120                                                                                                                                                                                                             |
| chr5  | 15124816  | 15125295  | 3.5 | <i>Speer4d*</i>      | Spermatogenesis associated glutamate (E)-rich protein                                                                                                                                                                           |
| chr17 | 6494046   | 6494217   | 3.4 | <i>Tmem181b-ps</i>   | Transmembrane protein 181B, pseudogene                                                                                                                                                                                          |
| chr5  | 15125523  | 15125706  | 3.2 | <i>Speer4d</i>       | Spermatogenesis associated glutamate (E)-rich protein 4D                                                                                                                                                                        |
| chr5  | 14914917  | 14915152  | 3.1 | <i>Gm9758</i>        | Predicted gene 9758                                                                                                                                                                                                             |
| chr5  | 15032099  | 15032493  | 2.9 | <i>Gm17019</i>       | Predicted gene 17020                                                                                                                                                                                                            |
| chr17 | 6491637   | 6491975   | 2.5 | <i>Tmem181b-ps</i>   | Transmembrane protein 181B, pseudogene                                                                                                                                                                                          |
| chr18 | 37463167  | 37463871  | 2.8 | <i>Pcdhb3</i>        | Pcdhb3 may play a critical role in the establishment and function of specific cell-cell connections, cell adhesion                                                                                                              |
| chr5  | 14936238  | 14936480  | 2.6 | <i>Speer4e</i>       | Spermatogenesis associated glutamate (E)-rich protein 4e                                                                                                                                                                        |
| chr17 | 6429542   | 6429778   | 2.6 | <i>Dynl1b*</i>       | Dynl1b plays a key role in the dynein-independent function of Tctex-1                                                                                                                                                           |
| chr1  | 194608391 | 194608626 | 2.5 | <i>Hhat</i>          | Skinny hedgehog encodes an enzyme that acts within the secretory pathway to catalyze amino-terminal palmitoylation of 'hedgehog'                                                                                                |
| chr5  | 14937599  | 14937829  | 2.5 | <i>Speer4e</i>       | Spermatogenesis associated glutamate (E)-rich protein 4e                                                                                                                                                                        |
| chr5  | 14976373  | 14976907  | 2.5 | <i>Speer8-ps1</i>    | Spermatogenesis associated glutamate (E)-rich protein 8, pseudogene 1                                                                                                                                                           |
| chr3  | 100723591 | 100731489 | 2.5 | <i>Trim45*</i>       | The encoded protein may function as a transcriptional repressor of the mitogen-activated protein kinase pathway                                                                                                                 |
| chr5  | 14944534  | 14944797  | 2.4 | <i>Speer8-ps1</i>    | Spermatogenesis associated glutamate (E)-rich protein 8, pseudogene 1                                                                                                                                                           |
| chr17 | 6492231   | 6492684   | 2.4 | <i>Tmem181b-ps</i>   | Transmembrane protein 181B, pseudogene                                                                                                                                                                                          |
| chr8  | 73608544  | 73608886  | 2.3 | <i>1700026F02Rik</i> | RIKEN cDNA 1700026F02 gene                                                                                                                                                                                                      |
| chr15 | 98721379  | 98721524  | 2.3 | <i>Dhh</i>           | Desert Hedgehog/Patched 1 signaling specifies fetal Leydig cell fate in testis organogenesis, combinatorial expression of the paracrine factor Dhh and nuclear transcription factor Sf1 is required for Leydig cell development |
| chr2  | 135536752 | 135537192 | 2.3 | <i>Plcb4*</i>        | Plcb4 has a role in phosphatidylinositol phospholipase C activity                                                                                                                                                               |
| chr8  | 66190792  | 66191168  | 2.2 | <i>Sgol2b</i>        | Shugoshin like 2b (S. pombe) may play role in cell cycle                                                                                                                                                                        |
| chr8  | 74543719  | 74544319  | 2.2 | <i>Cyp4f18</i>       | Cyp4f18 is necessary for omega oxidation of leukotriene B4 in neutrophils, oxidoreductase activity                                                                                                                              |
| chr5  | 15031093  | 15031323  | 2.2 | <i>Gm17019</i>       | Predicted gene 17019                                                                                                                                                                                                            |
| chr7  | 142450407 | 142451206 | 2.2 | <i>Nps</i>           | Nps plays role GPCR signalling                                                                                                                                                                                                  |
| chr7  | 125554914 | 125555453 | 2.2 | <i>Syt17</i>         | Syt17 (Synaptotagmin XVII) play role in transporter activity                                                                                                                                                                    |
| chr17 | 6493079   | 6493317   | 2.2 | <i>Tmem181b-ps</i>   | Transmembrane protein 181B, pseudogene                                                                                                                                                                                          |
| chr17 | 6475846   | 6476233   | 2.2 | <i>Tmem181b-ps</i>   | Transmembrane protein 181B, pseudogene                                                                                                                                                                                          |
| chr5  | 16072354  | 16072830  | 2.1 | <i>Hgf</i>           | Hepatocyte growth factor regulates cell growth, cell motility, and morphogenesis by activating a tyrosine kinase signaling cascade after binding to the proto-oncogenic c-Met receptor                                          |
| chr10 | 92038881  | 92039318  | 2.1 | <i>Nedd1</i>         | Nedd1 play role in cell cycle                                                                                                                                                                                                   |
| chr4  | 37196302  | 37197507  | 2.0 | <i>Lingo2</i>        | Lingo2 play role in early development                                                                                                                                                                                           |
| chr8  | 68941877  | 68942087  | 2.0 | <i>March1</i>        | March1 is a member of membrane-bound E3 ubiquitin ligases                                                                                                                                                                       |
| chr12 | 46228758  | 46229166  | 2.0 | <i>Stxbp6</i>        | Stxbp6 plays role in vesicle-mediated transport, phosphatidylinositol-4,5-bisphosphate binding                                                                                                                                  |
| chr14 | 44121518  | 44121728  | 2.0 | <i>Gm10375</i>       | Predicted gene 10375                                                                                                                                                                                                            |

\* Peaks are located within TSS

Table S3

## Functional classification of genes located nearby ncRNAs

| GO term number | GO term name                       | Genes are in cluster                                  | P-Value |
|----------------|------------------------------------|-------------------------------------------------------|---------|
| GO:0005912     | adherens junction                  | <i>Ptprc, Tln2, Dlg5, Flnb</i>                        | 0.004   |
| GO:0006909     | phagocytosis                       | <i>Cdc42se2, Elmol1, Elmod1</i>                       | 0.010   |
| GO:0046907     | intracellular protein transport    | <i>Slc25a13, Erbb2ip, Stam, Arfip1, Tnpol, Hook3</i>  | 0.056   |
| GO:0005743     | mitochondrial inner membrane       | <i>Nat8b, Fech, Slc25a13, Au042651</i>                | 0.064   |
| GO:0006468     | protein amino acid phosphorylation | <i>Irak4, Ptprc, Ick, Csnk1e, 4921509C19Rik, Pim1</i> | 0.05    |

Table S4

Functional annotation of genes with putative Nr5a2 binding site

| Go Term number | GO term name                  | Genes are in cluster                | P-Value |
|----------------|-------------------------------|-------------------------------------|---------|
| GO:0004857     | enzyme inhibitor activity     | Cst13, Cst8, Cst9, Spock3           | 0.04    |
| GO:0002253     | activation of immune response | Ptpnc, Cd55, Daf2                   | 0.03    |
| GO:0007626     | locomotory behavior           | Nrp2, Ccl21c, Ccl21b, Gm1987, Klhl1 | 0.05    |
| GO:0042157     | lipoprotein metabolic process | Apol10A, Apol9A, Apol7B             | 0.03    |

Fig. S1

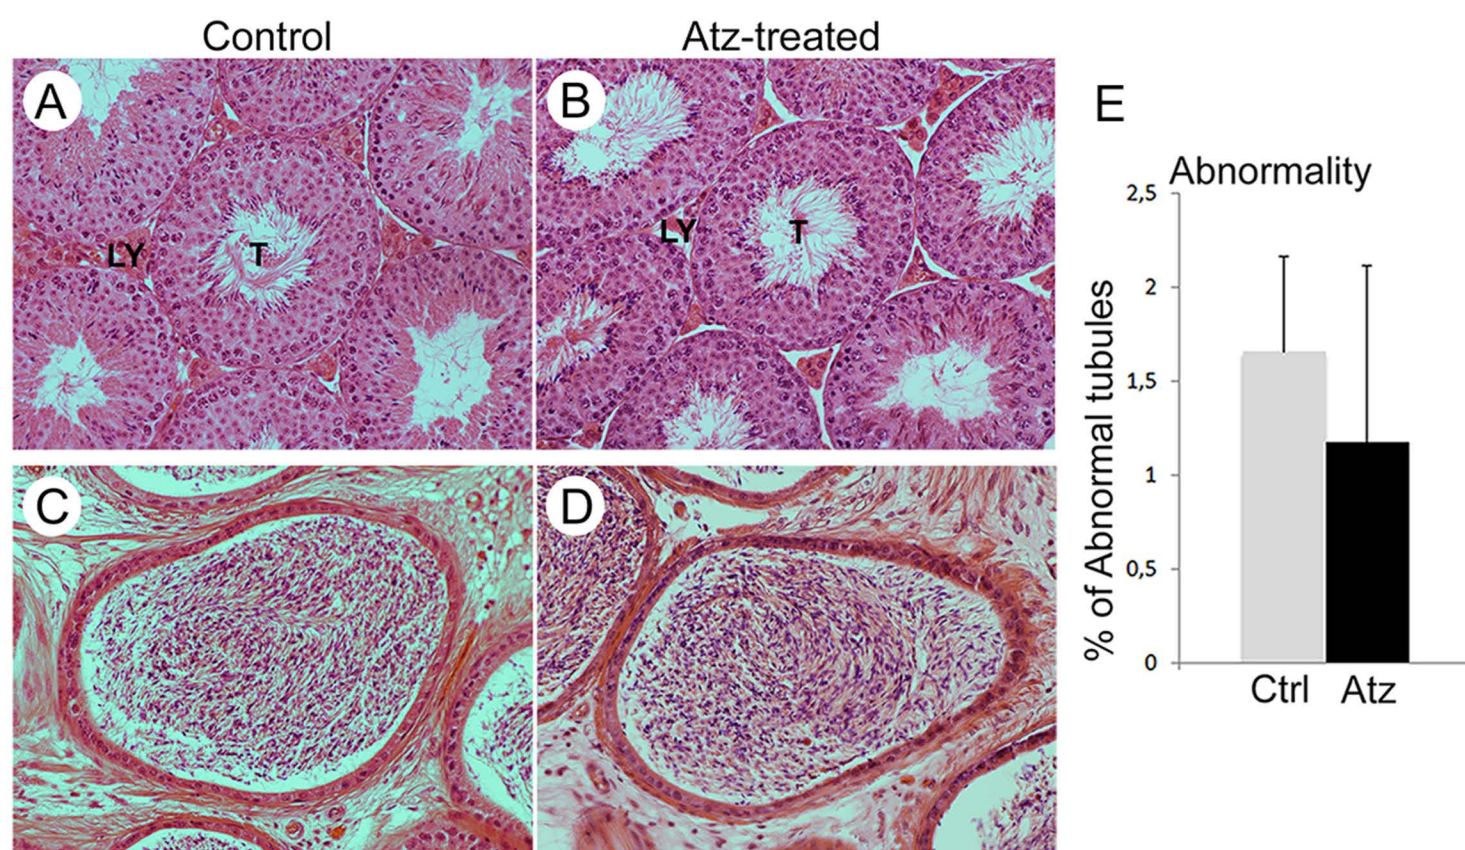

**Fig. S1.** Low-dose ATZ treatment doesn't affect the morphology of reproductive organs. A-D, Histological H&E stained sections of testis (A-B) and epididymis (C,D), (E) The percentage of abnormal tubules sections in ATZ-treated mice compared to the control. The abnormal tubules correspond to the sections where one or more germ cell layers were missing.

Fig. S2

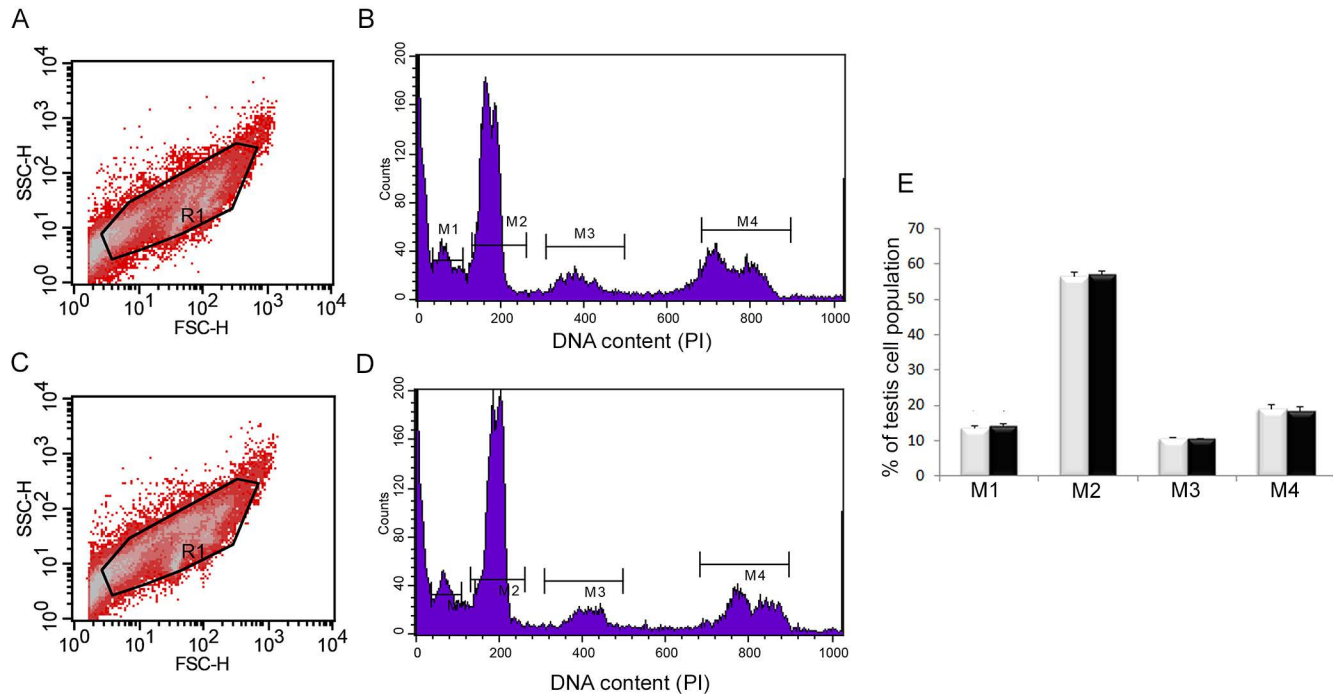

**Fig. S2.** Low-dose of atrazine doesn't affect cells population in seminiferous tubules. (A-D) The example of flow cytometric analysis of germ cells from (A-B) control and (C-D) treated mice. The same populations of cells were analyzed for each sample. The DNA content of cells was evaluated by propidium iodide incorporation (PI), four populations of cells were detected: M1, spermatozoa, M2, haploid cells, M3, diploid cells and M4, tetraploid cells (meiotic cells). (E) A quantitative analysis of each cell types; n=10.

Fig. S3

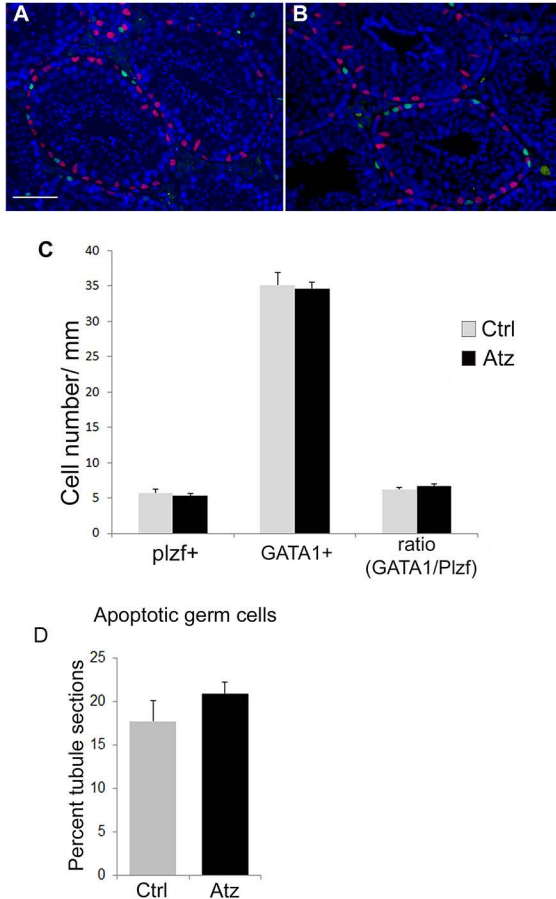

**Fig. S3.** Atrazine at low-dose doesn't affect the numbers of the undifferentiated spermatogonia and Sertoli cells. (A-B) Histological sections of (A) control and (B) ATZ-treated testes. Undifferentiated spermatogonia were labeled with anti-PLZF antibody (in green), Sertoli cells were labeled with anti- GATA1 (in red) antibodies (C) Labeled Sertoli and spermatogonia cells were counted at stage VII, the contours of each tubule section were measured using the Image J software. The data show the number of cell counts per millimeter of tubule circumference, scale bar: 50 $\mu$ m. (D) The TUNEL assays of testes sections. The results of at least 4 experiments were counted and presented as the percent of tubules containing apoptotic cells.

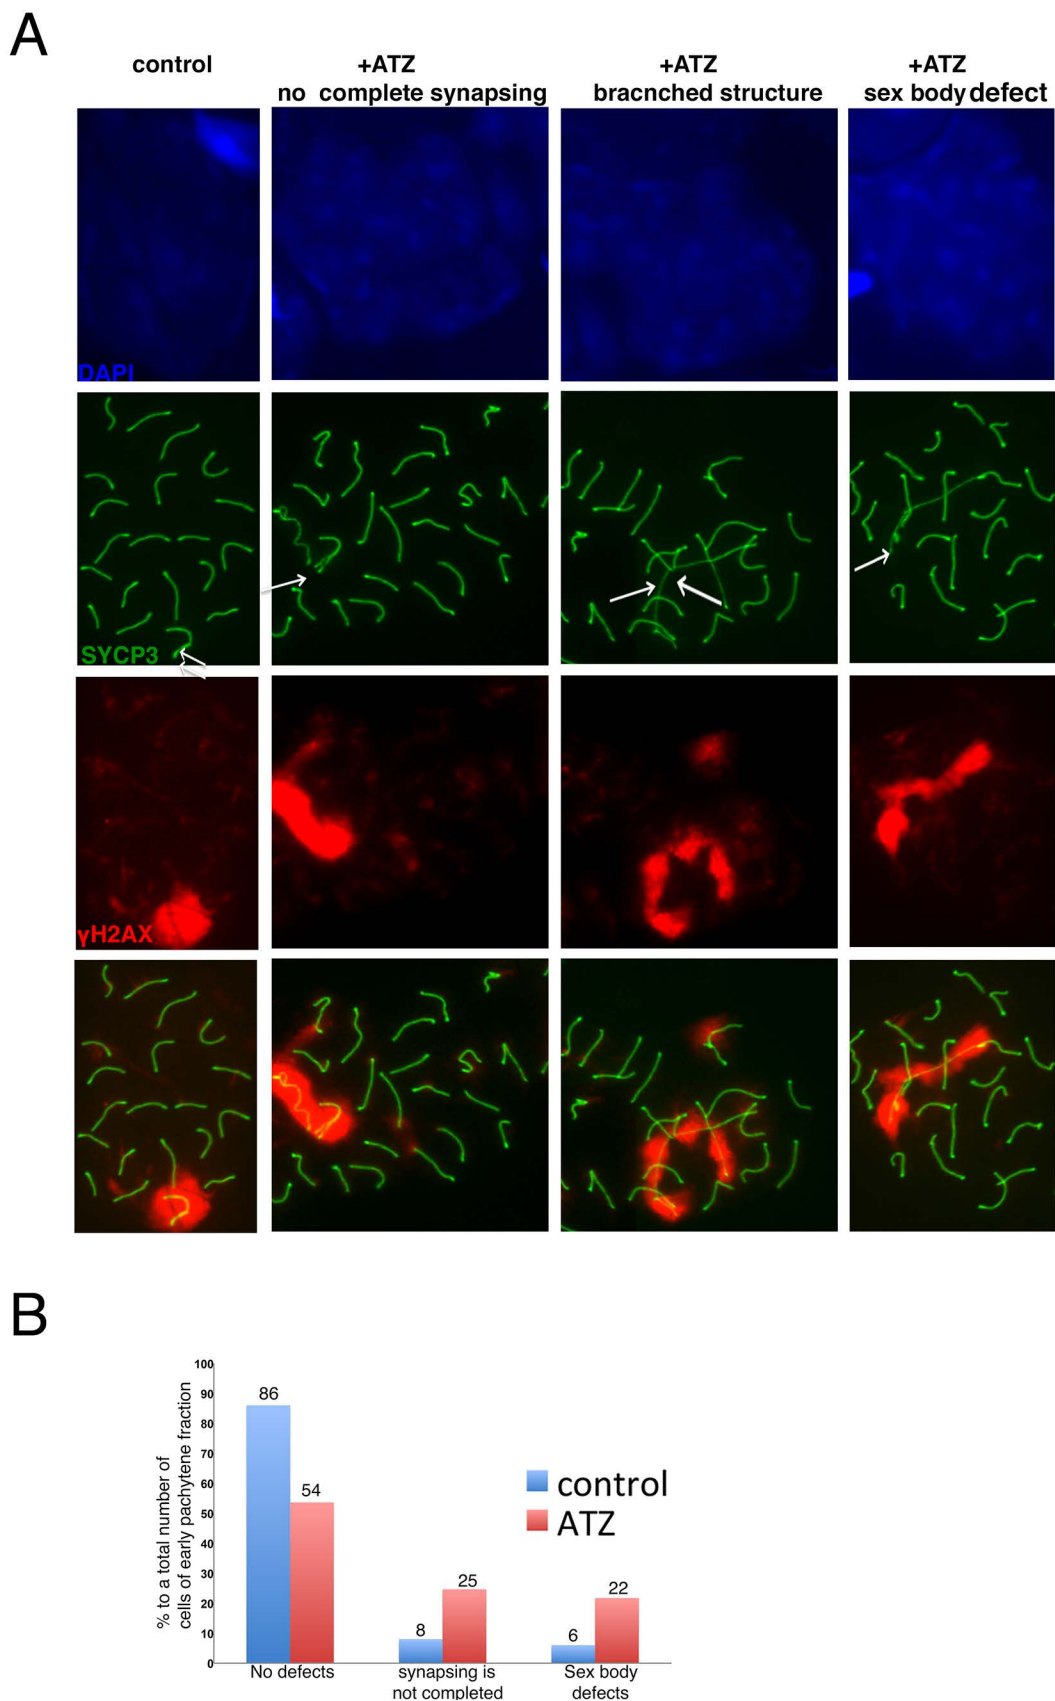

**Fig. S4.** Atrazine affects the chromosomes synapsing. (A) The analysis of  $\gamma$ H2AX and SYCP3 pattern of early pachytene staining: In control samples  $\gamma$ H2AX staining is weak at autosomal chromosomes but strong at sex body (first panel), in treated mice there is increase of cells with defects (1) single unsynapsed chromosomes, which show strong  $\gamma$ H2AX staining at autosomes (second panel), (2) there is the increase of cells with branched structures (third panel), (3) sex body has a long axes. (B) The distribution of defects was estimated in 100 cells at early pachytene stage from four independent experiments.

Fig.S5

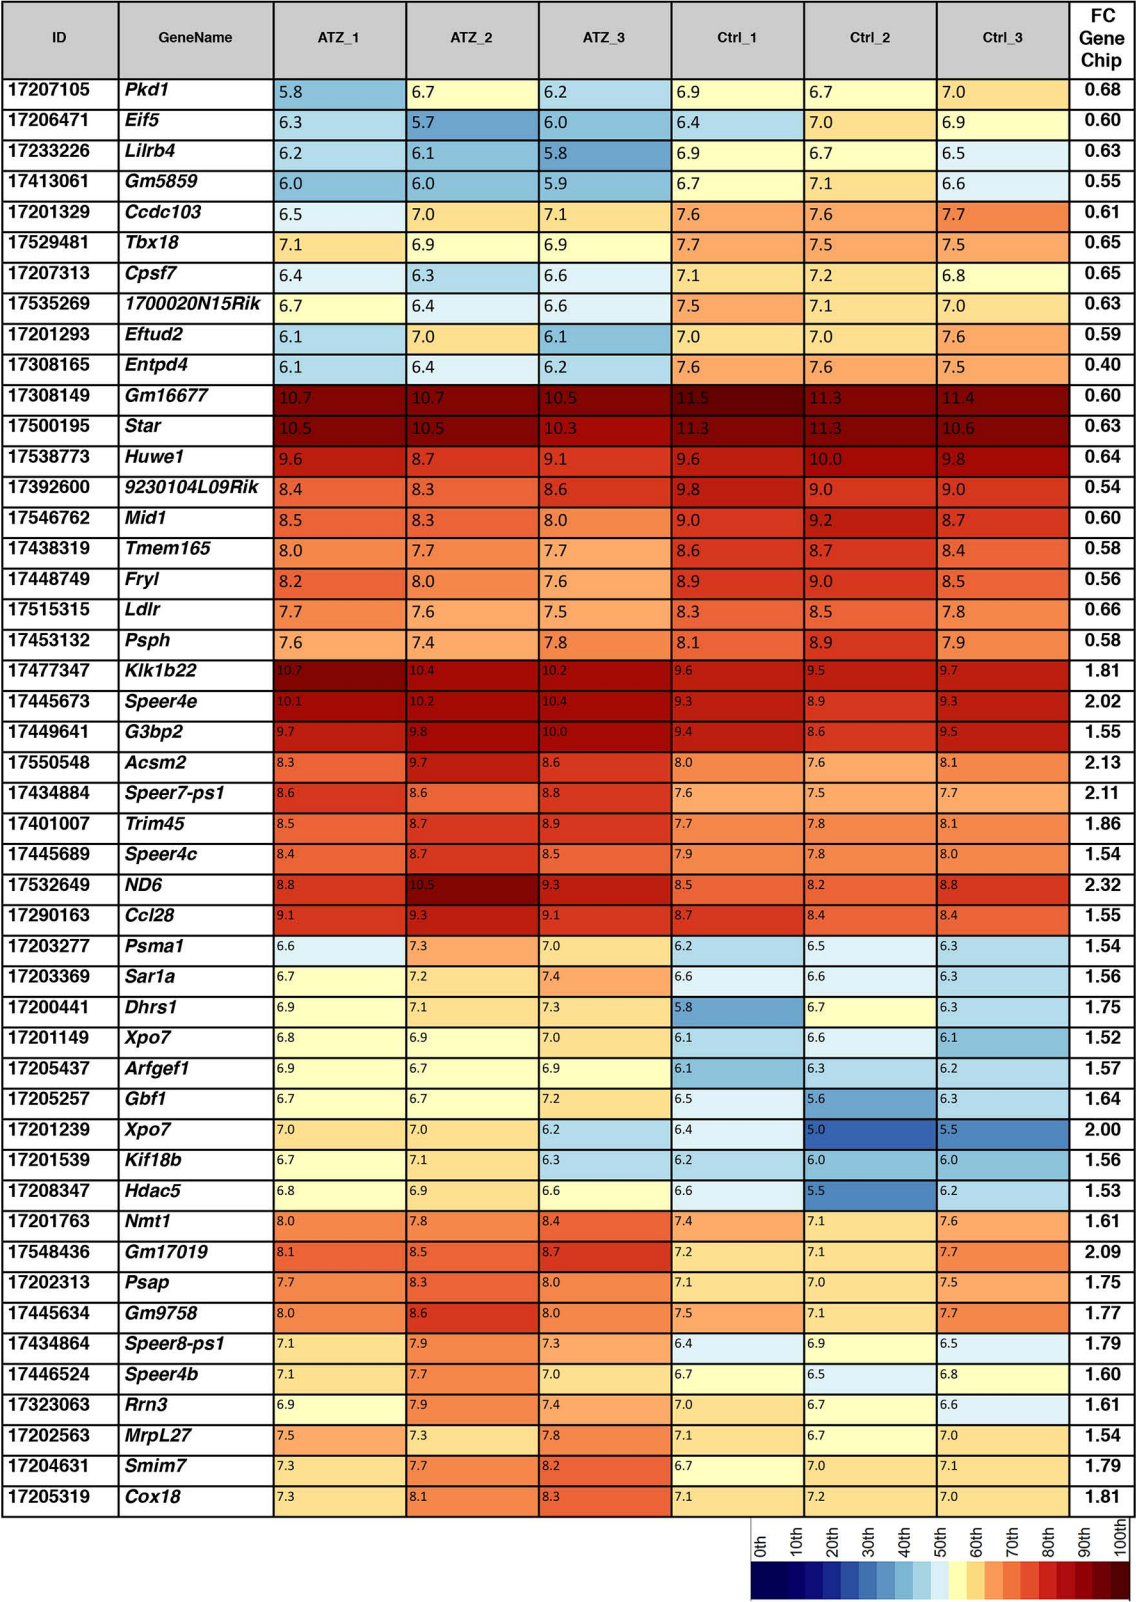

**Fig. S5.** Atrazine affects the genes expression. The differentially expressed genes were identified by Gene-Chip method. The first column shows the Affymetrix ID number, the second column shows the official gene symbols. The log2 scale of GeneChip values is given for ATZ or control samples. The fold changes of gene expression are shown in a last column.

Fig.S6

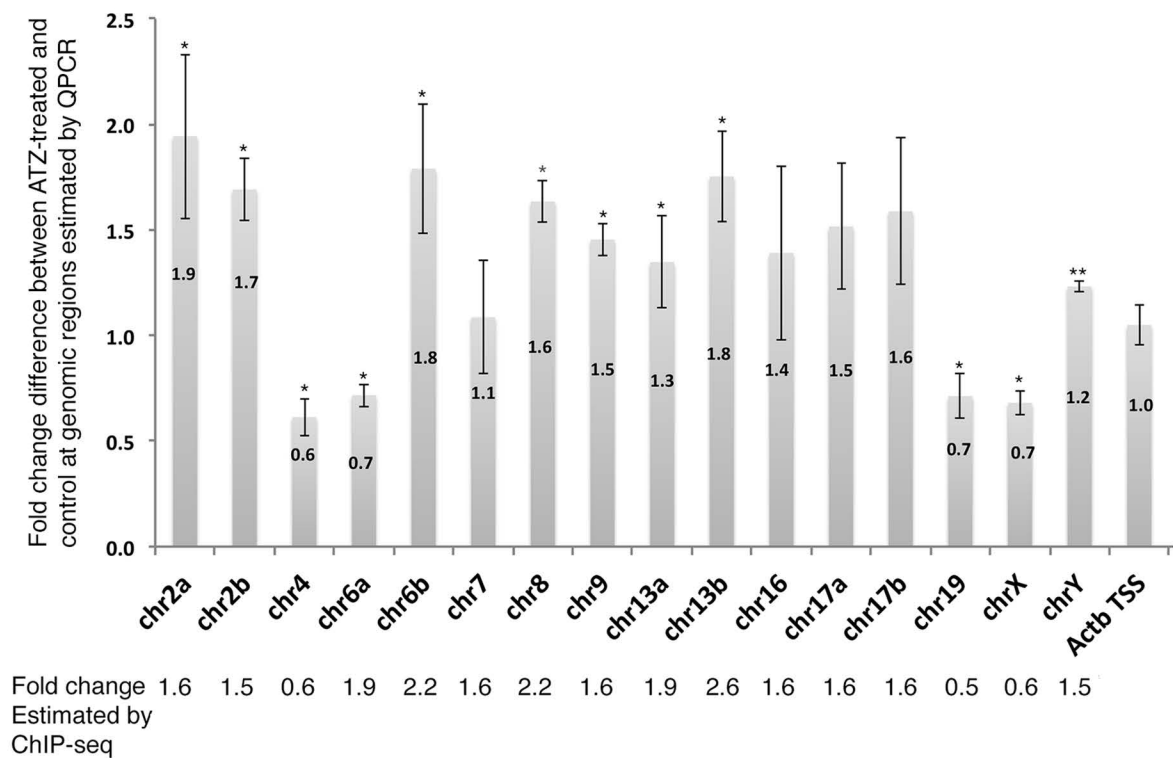

**Fig. S6.** ChIP-qPCR confirmation of identified differential H3K4me3 peaks. ChIPs were performed from 3 biological replicates of control and treated testes (details in Materials and Methods section). The equal amounts of DNA of ChIP and Input material were taken for qPCR. The ChIP efficiency was estimated by performing qPCR analysis of enrichment of promoters DNA of ActB, housekeeping gene, and as negative control the region of genome with absence any H3K4me3 signal was used. The enrichment of *Actb* is similar in both sets of samples and there is no enrichment of negative region (data not shown). ChIP-qPCR was performed as described in Materials and Methods section. Enrichments were estimated as a copy numbers in ChIP samples compared to the copy numbers in the input samples. The averaged values of enrichment of at least three treated samples were compared, plotted and expressed as fold change.

| Supplementary file 1. Differential H3K4me3 peaks are not associated with DSBs |           |           |             |                     |                      |                               |                                   |                                 |                                     |
|-------------------------------------------------------------------------------|-----------|-----------|-------------|---------------------|----------------------|-------------------------------|-----------------------------------|---------------------------------|-------------------------------------|
| Chromosome                                                                    | Start     | End       | Fold_Change | H3K4me3_Accumulated | H3K4me3_Within_genes | H3K4me3_nearest_upstream_gene | Distance_to_nearest_upstream_gene | H3K4me3_nearest_downstream_gene | Distance_to_nearest_downstream_gene |
| chr5                                                                          | 15217817  | 15218108  | 6.2         | ATZ                 | Speer7-ps1           | 4930572O03Rik                 | 54940                             | 4930519H02Rik                   | 151638                              |
| chr5                                                                          | 14936867  | 14937118  | 6.0         | ATZ                 | Speer4e              | Gm9758                        | 21978                             | Speer8-ps1                      | 8176                                |
| chr5                                                                          | 14977994  | 14978281  | 5.7         | ATZ                 | Speer8-ps1           | Speer4e                       | 39519                             | Gm17019                         | 50669                               |
| chr5                                                                          | 14978623  | 14978993  | 4.8         | ATZ                 | NA                   | Speer8-ps1                    | 82                                | Gm17019                         | 49957                               |
| chr1                                                                          | 13214621  | 13215994  | 4.2         | cont                | Ncoa2                | Prdm14                        | 97377                             | Tram1                           | 338789                              |
| chr5                                                                          | 15124816  | 15125295  | 3.5         | ATZ                 | Speer4d              | Gm17019                       | 91809                             | 4930572O03Rik                   | 32811                               |
| chr17                                                                         | 6494046   | 6494217   | 3.4         | ATZ                 | NA                   | Tmem181b-ps                   | 43904                             | Dynlt1f                         | 106579                              |
| chr5                                                                          | 15125523  | 15125706  | 3.2         | ATZ                 | Speer4d              | Gm17019                       | 92516                             | 4930572O03Rik                   | 32400                               |
| chr5                                                                          | 14914917  | 14915152  | 3.1         | ATZ                 | NA                   | Gm9758                        | 28                                | Speer4e                         | 18479                               |
| chr14                                                                         | 69909210  | 69910543  | 3.0         | cont                | Synb                 | Slc25a37                      | 6050                              | Gm16677                         | 37221                               |
| chr5                                                                          | 15032099  | 15032493  | 2.9         | ATZ                 | Gm17019              | Speer8-ps1                    | 53558                             | Speer4d                         | 92424                               |
| chr18                                                                         | 37463167  | 37463871  | 2.8         | ATZ                 | Pcdha4-g<br>Pcdhb3   | Pcdhb2                        | 5899                              | Pcdhb4                          | 3238                                |
| chr14                                                                         | 69943852  | 69944785  | 2.7         | cont                | NA                   | Synb                          | 31496                             | Gm16677                         | 2979                                |
| chr5                                                                          | 14936238  | 14936480  | 2.6         | ATZ                 | Speer4e              | Gm9758                        | 21349                             | Speer8-ps1                      | 8814                                |
| chr17                                                                         | 6429542   | 6429778   | 2.6         | ATZ                 | Dynlt1b              | Dynlt1a                       | 112068                            | Tmem181b-ps                     | 8372                                |
| chr5                                                                          | 14937599  | 14937829  | 2.5         | ATZ                 | Speer4e              | Gm9758                        | 22710                             | Speer8-ps1                      | 7465                                |
| chr3                                                                          | 100723591 | 100731489 | 2.5         | ATZ                 | Trim45               | Vtcn1                         | 22746                             | Ttf2                            | 11294                               |
| chr1                                                                          | 194608391 | 194608626 | 2.5         | ATZ                 | NA                   | Hhat                          | 10978                             | 1700065J18Rik                   | 59273                               |
| chr17                                                                         | 6491637   | 6491975   | 2.5         | ATZ                 | NA                   | Tmem181b-ps                   | 41495                             | Dynlt1f                         | 108821                              |
| chr5                                                                          | 14976373  | 14976907  | 2.5         | ATZ                 | Speer8-ps1           | Speer4e                       | 37898                             | Gm17019                         | 52043                               |
| chr5                                                                          | 14944534  | 14944797  | 2.4         | ATZ                 | NA                   | Speer4e                       | 6059                              | Speer8-ps1                      | 497                                 |
| chr17                                                                         | 6492231   | 6492684   | 2.4         | ATZ                 | NA                   | Tmem181b-ps                   | 42089                             | Dynlt1f                         | 108112                              |
| chr15                                                                         | 98721379  | 98721524  | 2.3         | ATZ                 | NA                   | Rheb1                         | 9534                              | Dhh                             | 1934                                |
| chr8                                                                          | 73608544  | 73608886  | 2.3         | ATZ                 | NA                   | 1700026F02Rik                 | 57890                             | Haus8                           | 166137                              |
| chr2                                                                          | 135536752 | 135537192 | 2.3         | ATZ                 | NA                   | 9630028H03Rik                 | 127796                            | Plcb4                           | 30374                               |
| chr17                                                                         | 6493079   | 6493317   | 2.2         | ATZ                 | NA                   | Tmem181b-ps                   | 42937                             | Dynlt1f                         | 107479                              |
| chr8                                                                          | 66190792  | 66191168  | 2.2         | ATZ                 | NA                   | Spock3                        | 354899                            | Gm4975                          | 212323                              |
| chr5                                                                          | 15031093  | 15031323  | 2.2         | ATZ                 | Gm17019              | Speer8-ps1                    | 52552                             | Speer4d                         | 93594                               |
| chr7                                                                          | 142450407 | 142451206 | 2.2         | ATZ                 | NA                   | 1700120G07Rik                 | 62722                             | Nps                             | 9096                                |
| chr15                                                                         | 36579531  | 36580059  | 2.2         | cont                | NA                   | Pabpc1                        | 40803                             | Ywhaz                           | 119957                              |
| chr16                                                                         | 65839556  | 65839983  | 2.2         | cont                | Vgll3                | Chmp2b                        | 276614                            | Cadm2                           | 815683                              |
| chr17                                                                         | 6475846   | 6476233   | 2.2         | ATZ                 | NA                   | Tmem181b-ps                   | 25704                             | Dynlt1f                         | 124563                              |
| chr7                                                                          | 125554914 | 125555453 | 2.2         | ATZ                 | Syt17                | 4930583K01Rik                 | 165849                            | Itpril2                         | 73173                               |
| chr5                                                                          | 16072354  | 16072830  | 2.1         | ATZ                 | Hgf                  | Cacna2d1                      | 192025                            | Speer4f                         | 909110                              |
| chr16                                                                         | 34657682  | 34658027  | 2.1         | cont                | Ropn1                | Kalrn                         | 143569                            | Ccdc14                          | 32675                               |
| chr14                                                                         | 70008610  | 70009670  | 2.1         | cont                | Loxl2                | Entpd4                        | 23811                             | R3hcc1                          | 87441                               |
| chr10                                                                         | 69070299  | 69070962  | 2.1         | cont                | Ank3                 | Cdk1                          | 254639                            | Ccdc6                           | 488907                              |
| chr8                                                                          | 68941877  | 68942087  | 2.0         | ATZ                 | March1               | BC030870                      | 1288441                           | Tma16                           | 58158                               |
| chr4                                                                          | 37196302  | 37197507  | 2.0         | ATZ                 | NA                   | Lingo2                        | 297525                            | 1700009N14Rik                   | 2199819                             |
| chr14                                                                         | 44121518  | 44121728  | 2.0         | ATZ                 | NA                   | 1700001F09Rik                 | 95174                             | Gm10375                         | 58564                               |
| chr19                                                                         | 25724428  | 25725066  | 2.0         | cont                | NA                   | Dmrt3                         | 26017                             | 2610016A17Rik                   | 20558                               |
| chr10                                                                         | 85270633  | 85270855  | 2.0         | ATZ                 | NA                   | Btbd11                        | 147596                            | Pwp1                            | 63721                               |
| chr11                                                                         | 11385440  | 11385926  | 2.0         | ATZ                 | NA                   | Zbp                           | 23018                             | 4930415F15Rik                   | 3343                                |
| chr19                                                                         | 36992713  | 36994298  | 2.0         | cont                | Fgfbp3               | Tnks2                         | 24746                             | Btaf1                           | 6271                                |
| chr16                                                                         | 3542341   | 3542982   | 2.0         | ATZ                 | NA                   | NA                            | NA                                | Olf161                          | 49416                               |
| chr6                                                                          | 72197660  | 72199094  | 1.9         | ATZ                 | NA                   | Atoh8                         | 12089                             | Sftpb                           | 54148                               |

|       |           |           |     |      |                   |               |         |               |        |
|-------|-----------|-----------|-----|------|-------------------|---------------|---------|---------------|--------|
| chr5  | 86337839  | 86338066  | 1.9 | ATZ  | NA                | Epha5         | 1491432 | Cenpc1        | 102984 |
| chr5  | 89172263  | 89172670  | 1.9 | ATZ  | Mob1b             | Grsf1         | 67067   | Dck           | 21368  |
| chr16 | 12757420  | 12757654  | 1.9 | ATZ  | NA                | Shisa9        | 486423  | 1700003L19Rik | 53829  |
| chr17 | 6489260   | 6489496   | 1.9 | ATZ  | NA                | Tmem181b-ps   | 39118   | Dynlt1f       | 111300 |
| chr1  | 50163539  | 50163765  | 1.9 | ATZ  | NA                | Slc39a10      | 3253185 | Tmeff2        | 820602 |
| chr17 | 80513489  | 80513760  | 1.9 | ATZ  | NA                | Hnrpll        | 51815   | Galm          | 13051  |
| chr7  | 138757178 | 138757585 | 1.9 | ATZ  | NA                | Bub3          | 41766   | Gpr26         | 400558 |
| chr3  | 145364044 | 145365224 | 1.9 | ATZ  | NA                | Cyr61         | 51095   | Ddah1         | 56432  |
| chr13 | 106679224 | 106679563 | 1.9 | ATZ  | NA                | Htr1a         | 441011  | Ipo11         | 904956 |
| chr13 | 37806834  | 37809620  | 1.9 | ATZ  | NA                | Ly86          | 295929  | Rreb1         | 108287 |
| chr15 | 61847741  | 61849545  | 1.9 | ATZ  | NA                | Myc           | 25825   | Pvt1          | 19997  |
| chr4  | 14721166  | 14721604  | 1.9 | ATZ  | Lrrc69            | Slc26a7       | 172241  | Otud6b        | 15048  |
| chrX  | 125046743 | 125046996 | 1.9 | ATZ  | NA                | 4921511C20Rik | 1116313 | 4930558G05Rik | 539064 |
| chr6  | 112602449 | 112602734 | 1.9 | ATZ  | Rad18             | Oxtr          | 162647  | Srgap3        | 65232  |
| chr9  | 122560789 | 122561878 | 1.9 | ATZ  | NA                | 9530059O14Rik | 71024   | Mir138-1      | 30116  |
| chr2  | 103328416 | 103330526 | 1.9 | ATZ  | NA                | Cat           | 3106    | Abtb2         | 75941  |
| chr16 | 93262599  | 93264142  | 1.9 | ATZ  | NA                | Runx1         | 436288  | 1810053B23Rik | 79819  |
| chr14 | 103513557 | 103515202 | 1.9 | ATZ  | Mycbp2            | Fbxl3         | 14831   | SceI          | 397356 |
| chr15 | 25337053  | 25337643  | 1.9 | ATZ  | Basp1             | Cdh18         | 1932880 | Gm5468        | 6304   |
| chr1  | 134121907 | 134122204 | 1.9 | ATZ  | Lemd1             | Mir135b       | 27146   | Klhdc8a       | 72999  |
| chr5  | 11256119  | 11256449  | 1.9 | ATZ  | NA                | Gm6455        | 385311  | Speer1-ps1    | 83959  |
| chr2  | 60618485  | 60619430  | 1.9 | ATZ  | Mir684-1<br>Rbms1 | Itgb6         | 57825   | Gm13582       | 183003 |
| chr17 | 38059443  | 38060367  | 1.9 | ATZ  | NA                | Olfr127       | 17979   | Olfr128       | 146    |
| chr10 | 105801438 | 105802642 | 1.8 | ATZ  | NA                | Ccdc59        | 516872  | Ppfia2        | 104724 |
| chr14 | 102641288 | 102642068 | 1.8 | ATZ  | NA                | Lmo7          | 307378  | Kctd12        | 733730 |
| chr8  | 119526236 | 119526479 | 1.8 | ATZ  | Pkd1l2            | Gcsh          | 8887    | Bcmo1         | 93286  |
| chr16 | 11106589  | 11107457  | 1.8 | ATZ  | Txndc11           | Snn           | 31511   | Zc3h7a        | 29230  |
| chr11 | 30471470  | 30471863  | 1.8 | ATZ  | Acyp2             | 4930505A04Rik | 99641   | Psme4         | 199912 |
| chr4  | 102815586 | 102817300 | 1.8 | ATZ  | Mier1             | Wdr78         | 28682   | Slc35d1       | 27023  |
| chr7  | 28522343  | 28523104  | 1.8 | ATZ  | Zfp60             | C030039L03Rik | 30842   | Gm10046       | 27588  |
| chr1  | 132317624 | 132318013 | 1.8 | ATZ  | Daf2              | Thsd7b        | 201769  | Cd55          | 17594  |
| chr2  | 156217533 | 156217700 | 1.8 | ATZ  | 2900097C17Rik     | Cnbd2         | 16159   | Epb4.111      | 29088  |
| chr2  | 171059519 | 171060824 | 1.8 | ATZ  | NA                | Dok5          | 354244  | 1700028P15Rik | 721555 |
| chr17 | 6476411   | 6476645   | 1.8 | ATZ  | NA                | Tmem181b-ps   | 26269   | Dynlt1f       | 124151 |
| chr9  | 77655868  | 77656207  | 1.8 | ATZ  | NA                | Gclc          | 13572   | Elov15        | 108965 |
| chr14 | 96282579  | 96283239  | 1.8 | ATZ  | NA                | 4921530L21Rik | 585     | Klhl1         | 221245 |
| chr15 | 57833085  | 57834200  | 1.8 | ATZ  | Fam83a            | Wdr67         | 31462   | 9130401M01Rik | 19627  |
| chr14 | 57070152  | 57070756  | 1.8 | ATZ  | Rnf17             | Atp12a        | 62764   | Cenpj         | 74842  |
| chr2  | 21991213  | 21991801  | 1.8 | ATZ  | NA                | Gpr158        | 239044  | Myo3a         | 157329 |
| chr14 | 69953593  | 69956310  | 1.8 | cont | Entpd4<br>Gm16677 | Synb          | 41237   | Loxl2         | 52973  |
| chr1  | 138500886 | 138501281 | 1.8 | ATZ  | NA                | Kif14         | 72798   | Zfp281        | 20197  |
| chr17 | 88602063  | 88602668  | 1.8 | ATZ  | NA                | Gm4832        | 71607   | Foxn2         | 237384 |
| chr5  | 14945193  | 14945946  | 1.8 | ATZ  | Speer8-ps1        | Speer4e       | 6718    | Gm17019       | 83004  |
| chr16 | 38407586  | 38408059  | 1.8 | ATZ  | Pla1a             | Popdc2        | 29284   | Adprh         | 37420  |
| chr12 | 102287546 | 102288352 | 1.8 | ATZ  | Smek1             | Ccdc88c       | 20353   | D130020L05Rik | 32309  |
| chr7  | 126889145 | 126890054 | 1.8 | ATZ  | NA                | Thumpd1       | 24866   | Acsn3         | 14383  |
| chr1  | 13352269  | 13352932  | 1.8 | ATZ  | Ncoa2             | Prdm14        | 235025  | Tram1         | 201851 |
| chr14 | 72768642  | 72769553  | 1.8 | ATZ  | NA                | 4930434J06Rik | 448397  | Fndc3a        | 168207 |
| chr3  | 35840290  | 35840911  | 1.8 | ATZ  | NA                | Dcun1d1       | 8402    | Mccc1         | 17320  |
| chr5  | 104941675 | 104942629 | 1.8 | ATZ  | BC005561          | Pkd2          | 6837    | D930016D06Rik | 12125  |

|       |           |           |     |      |               |               |         |               |         |
|-------|-----------|-----------|-----|------|---------------|---------------|---------|---------------|---------|
| chr17 | 83847965  | 83848917  | 1.8 | ATZ  | Eml4          | Pkdcc         | 223556  | Cox7a2l       | 52340   |
| chr14 | 104397145 | 104397593 | 1.8 | ATZ  | 4930432J09Rik | Ednrb         | 153452  | Pou4f1        | 463948  |
| chr3  | 148175723 | 148176498 | 1.8 | ATZ  | NA            | Ttll7         | 1530009 | Lphn2         | 302052  |
| chr3  | 89564549  | 89566063  | 1.8 | ATZ  | Chrnrb2       | Adar          | 7172    | Ube2q1        | 11468   |
| chr5  | 47783319  | 47783794  | 1.8 | ATZ  | NA            | Lcorl         | 1534540 | Slit2         | 590600  |
| chr18 | 27139320  | 27140251  | 1.8 | ATZ  | NA            | Celf4         | 1226836 | 4930474G06Rik | 1578414 |
| chr13 | 19530318  | 19530677  | 1.8 | ATZ  | NA            | Stard3nl      | 42697   | Epdr1         | 152900  |
| chr2  | 169065091 | 169066880 | 1.8 | ATZ  | NA            | 1700017J07Rik | 260685  | Tshz2         | 392266  |
| chr11 | 49195710  | 49197180  | 1.8 | ATZ  | NA            | Olfr1390      | 40739   | Olfr1389      | 46749   |
| chr18 | 80450663  | 80451116  | 1.8 | ATZ  | NA            | Hsbp1l1       | 6822    | Pqlc1         | 868     |
| chr7  | 65025550  | 65026024  | 1.8 | ATZ  | Gabrb3        | Gabra5        | 260171  | Atp10a        | 887548  |
| chr3  | 35597128  | 35598415  | 1.8 | ATZ  | NA            | Gm6639        | 32043   | Atp11b        | 54645   |
| chr4  | 42087908  | 42088257  | 1.8 | cont | 4933409K07Rik | Gm13308       | 274498  | Gm1987        | 142786  |
| chr13 | 74684021  | 74684602  | 1.8 | ATZ  | NA            | Zfp825        | 52623   | Erap1         | 92718   |
| chr17 | 6429271   | 6429489   | 1.8 | ATZ  | Dynlt1b       | Dynlt1a       | 111797  | Tmem181b-ps   | 8661    |
| chr8  | 51601691  | 51602594  | 1.8 | ATZ  | NA            | Gm2516        | 100248  | Aga           | 2994462 |
| chr6  | 34731741  | 34732540  | 1.8 | ATZ  | Agbl3         | Cald1         | 6272    | Tmem140       | 80606   |
| chr14 | 69900581  | 69904584  | 1.8 | cont | Slc25a37      | Nkx3-1        | 87866   | Synb          | 3871    |
| chr7  | 68117865  | 68118774  | 1.8 | ATZ  | NA            | Snrpn         | 832760  | B230209E15Rik | 555522  |
| chr9  | 113617811 | 113618749 | 1.8 | ATZ  | NA            | Pdcd6ip       | 434     | Clasp2        | 31842   |
| chr18 | 77094514  | 77095422  | 1.8 | cont | Skor2         | Smad2         | 623113  | Ier3ip1       | 73344   |
| chr11 | 73506782  | 73507813  | 1.8 | ATZ  | Zfp735        | Olfr384       | 89760   | Olfr389       | 82076   |
| chr6  | 57428835  | 57429249  | 1.8 | ATZ  | NA            | Vmn1r20       | 46239   | Ppm1k         | 27247   |
| chr6  | 57426415  | 57427090  | 1.8 | ATZ  | NA            | Vmn1r20       | 43819   | Ppm1k         | 29406   |
| chr7  | 46667691  | 46667977  | 1.8 | ATZ  | Gm5114        | Gm21276       | 147787  | Zfp939        | 36911   |
| chr14 | 97450641  | 97451506  | 1.8 | ATZ  | NA            | Klhl1         | 532388  | Dach1         | 734560  |
| chr2  | 101000357 | 101002460 | 1.8 | ATZ  | NA            | Lrrc4c        | 3528536 | B230118H07Rik | 398478  |
| chr6  | 52857336  | 52860198  | 1.8 | ATZ  | Jazf1         | Tax1bp1       | 140563  | Gm4872        | 310960  |
| chr2  | 65106788  | 65107361  | 1.8 | ATZ  | Mir684-1      | Cobll1        | 30105   | Slc38a11      | 47329   |
| chr17 | 38040471  | 38040854  | 1.8 | ATZ  | Olfr127       | Olfr126       | 51973   | Olfr128       | 19659   |
| chr8  | 126329483 | 126330677 | 1.7 | ATZ  | Rab4a         | 6030466F02Rik | 65642   | Ccsap         | 34067   |
| chr1  | 138469744 | 138470787 | 1.7 | ATZ  | NA            | Kif14         | 41656   | Zfp281        | 50691   |
| chr15 | 14388872  | 14390787  | 1.7 | ATZ  | NA            | Cdh6          | 1285478 | Cdh9          | 2317069 |
| chr14 | 104437127 | 104438748 | 1.7 | ATZ  | NA            | 4930432J09Rik | 10768   | Pou4f1        | 422793  |
| chr6  | 135609075 | 135610578 | 1.7 | ATZ  | NA            | Emp1          | 275884  | Grin2b        | 69245   |
| chr11 | 101983975 | 101985159 | 1.7 | ATZ  | NA            | Pyy           | 14885   | Nags          | 21668   |
| chr5  | 144412066 | 144413482 | 1.7 | ATZ  | Cyth3         | Fam220a       | 86673   | Usp42         | 57713   |
| chr12 | 114782407 | 114783417 | 1.7 | ATZ  | Adam6a        | Adam6b        | 52361   | Zfp386        | 2502518 |
| chr9  | 5120690   | 5122480   | 1.7 | ATZ  | NA            | Gria4         | 324456  | Casp1         | 176037  |
| chr3  | 84183136  | 84183927  | 1.7 | ATZ  | 4930565D16Rik | Trim2         | 74439   | Fhdc1         | 62191   |
| chr12 | 70166635  | 70167966  | 1.7 | ATZ  | NA            | Gm17821       | 1396377 | Rps29         | 90743   |
| chr6  | 49439913  | 49440484  | 1.7 | ATZ  | NA            | Stk31         | 20412   | Npy           | 332244  |
| chr11 | 84013887  | 84014648  | 1.7 | ATZ  | Acaca         | Gm11437       | 32909   | Aatf          | 221710  |
| chr19 | 57644795  | 57645770  | 1.7 | ATZ  | NA            | 6720468P15Rik | 57517   | Atrnl1        | 39754   |
| chr2  | 168023061 | 168024440 | 1.7 | ATZ  | Adnp          | E130018N17Rik | 43048   | Dpm1          | 10108   |
| chr8  | 131552476 | 131552963 | 1.7 | ATZ  | Ccdc7         | Itgb1         | 294997  | 1700008F21Rik | 38071   |
| chr13 | 86706309  | 86707209  | 1.7 | ATZ  | NA            | Cox7c         | 519909  | Edil3         | 2253868 |
| chr6  | 100072847 | 100075871 | 1.7 | ATZ  | NA            | Prok2         | 396461  | Rybp          | 102688  |
| chr11 | 43090622  | 43091789  | 1.7 | ATZ  | NA            | Atp10b        | 14835   | Mir146        | 96110   |
| chr6  | 47072868  | 47073123  | 1.7 | ATZ  | Cntnap2       | Tpk1          | 3456694 | Cul1          | 331200  |
| chr7  | 31948073  | 31948979  | 1.7 | ATZ  | Gm10640       | Gramd1a       | 12004   | Scgb1b2       | 126559  |
| chr5  | 15510247  | 15511699  | 1.7 | ATZ  | Cacna2d1      | 4930519H02Rik | 120663  | Hgf           | 547669  |

|       |           |           |     |      |                |               |         |               |         |
|-------|-----------|-----------|-----|------|----------------|---------------|---------|---------------|---------|
| chr15 | 80650055  | 80652695  | 1.7 | ATZ  | Tnrc6b         | Fam83f        | 119200  | Mir5113       | 117774  |
| chr1  | 37614857  | 37617687  | 1.7 | ATZ  | NA             | Mgat4a        | 21753   | 2010300C02Rik | 50834   |
| chr7  | 48288116  | 48289359  | 1.7 | ATZ  | Gm4884         | 4930433I11Rik | 37913   | Gm5592        | 250338  |
| chr13 | 48621523  | 48622032  | 1.7 | ATZ  | NA             | Zfp169        | 12718   | Mirlet7d      | 9349    |
| chr13 | 3607049   | 3608474   | 1.7 | ATZ  | BC016423       | Gdi2          | 41542   | Asb13         | 24804   |
| chr2  | 113125638 | 113127207 | 1.7 | ATZ  | Tmco5b         | Ryr3          | 255150  | Fmn1          | 40686   |
| chr2  | 113927143 | 113929560 | 1.7 | ATZ  | Aqr            | C130080G10Rik | 39905   | Zfp770        | 89637   |
| chr13 | 103930028 | 103930674 | 1.7 | cont | Mast4          | Cd180         | 433317  | Srek1         | 601021  |
| chr18 | 67708306  | 67709050  | 1.7 | ATZ  | Spire1         | Slmo1         | 68071   | Cep76         | 68001   |
| chr4  | 58560065  | 58561619  | 1.7 | ATZ  | Lpar1          | Mir3095       | 106095  | Olfr267       | 236032  |
| chr5  | 39697186  | 39697578  | 1.7 | ATZ  | NA             | Clnk          | 429254  | 4930513D17Rik | 155410  |
| chr6  | 79098702  | 79099811  | 1.7 | ATZ  | NA             | Gm20362       | 112839  | Gm20594       | 668214  |
| chr10 | 104751393 | 104753044 | 1.7 | ATZ  | Tmtc2          | Gm20765 Gm2   | 1117817 | Gm15663       | 258563  |
| chr15 | 9083841   | 9086297   | 1.7 | ATZ  | Lmbrd2         | Skp2          | 13634   | Ugt3a1        | 123287  |
| chr15 | 3808941   | 3809403   | 1.7 | ATZ  | NA             | Ghr           | 275711  | Fbxo4         | 104161  |
| chrX  | 55981083  | 55981440  | 1.7 | ATZ  | NA             | Zic3          | 691276  | 4930550L24Rik | 183198  |
| chr12 | 87588060  | 87588790  | 1.7 | ATZ  | Gpatch2l       | Gm805         | 52008   | Esrrb         | 113277  |
| chr4  | 87196895  | 87197341  | 1.7 | ATZ  | NA             | Slc24a2       | 320451  | Mllt3         | 218488  |
| chr6  | 18817948  | 18818577  | 1.7 | ATZ  | Ankrd7         | Naa38         | 13896   | Kcnd2         | 2347532 |
| chr18 | 22969705  | 22970634  | 1.7 | ATZ  | Nol4           | Asxl3         | 280977  | Dtna          | 603282  |
| chr6  | 40848538  | 40850874  | 1.7 | ATZ  | Prss58         | Moxd2         | 11045   | 1700074P13Rik | 19585   |
| chr15 | 50189298  | 50190448  | 1.7 | ATZ  | NA             | Csmd3         | 1565763 | Trps1         | 295857  |
| chr9  | 55661663  | 55662115  | 1.7 | ATZ  | Scaper         | Isl2          | 267678  | Rfpl3s        | 148281  |
| chr16 | 38894108  | 38894591  | 1.7 | ATZ  | NA             | 4930435E12Rik | 65246   | Igsf11        | 7867    |
| chr6  | 40877973  | 40878730  | 1.7 | ATZ  | 1700074P13Rik  | Prss58        | 27587   | 1810009J06Rik | 36041   |
| chr12 | 82478891  | 82479238  | 1.7 | ATZ  | Gm4787         | Slc8a3        | 44724   | Adam4         | 41298   |
| chr15 | 41563247  | 41564593  | 1.7 | ATZ  | Oxr1           | Zfpm2         | 627109  | Abra          | 132246  |
| chr1  | 179921652 | 179921924 | 1.7 | ATZ  | Gm16432        | Adss          | 195012  | Desi2         | 195624  |
| chr1  | 46723911  | 46724242  | 1.7 | ATZ  | NA             | Dnahc7b       | 293516  | Slc39a10      | 140147  |
| chr4  | 102413398 | 102415183 | 1.7 | ATZ  | NA             | Pde4b         | 133531  | Sgip1         | 17785   |
| chr18 | 45861158  | 45861734  | 1.7 | ATZ  | A330093E20Rik  | Kcnn2         | 15621   | Trim36        | 463220  |
| chr7  | 134491512 | 134492379 | 1.7 | ATZ  | NA             | Zfp768        | 2684    | Zfp747        | 23672   |
| chr9  | 55858768  | 55859124  | 1.7 | ATZ  | NA             | Rfpl3s        | 30029   | Gm7444        | 16319   |
| chr8  | 123225295 | 123226578 | 1.7 | ATZ  | NA             | Cox4i1        | 27186   | Irf8          | 33698   |
| chr16 | 24721439  | 24723477  | 1.7 | ATZ  | Lpp            | A730098P11Rik | 186881  | A230028O05Rik | 336248  |
| chr1  | 182991730 | 182992858 | 1.7 | ATZ  | NA             | 9130409I23Rik | 932     | Nvl           | 30696   |
| chr8  | 26700821  | 26701414  | 1.7 | ATZ  | Letm2          | Fgfr1         | 14635   | Whsc1l1       | 11364   |
| chr14 | 44377752  | 44378086  | 1.7 | ATZ  | NA             | Gm10375       | 192074  | Ear1          | 18345   |
| chr15 | 45808319  | 45809425  | 1.7 | ATZ  | NA             | Kcnv1         | 861839  | 1700022A22Rik | 346706  |
| chr1  | 146597447 | 146598780 | 1.7 | ATZ  | NA             | Rgs1          | 501213  | Rgs18         | 1191    |
| chr9  | 118241610 | 118242468 | 1.7 | ATZ  | NA             | Cmc1          | 182296  | 4933432G23Rik | 96489   |
| chr11 | 25740027  | 25740661  | 1.7 | ATZ  | 5730522E02Rik  | 4933427E13Rik | 472890  | Fanci1        | 546423  |
| chr3  | 157512913 | 157515312 | 1.7 | ATZ  | NA             | Ptger3        | 205191  | Cth           | 41900   |
| chr17 | 7151832   | 7152054   | 1.7 | ATZ  | Rsph3b         | Mir692-1      | 52146   | Tagap1        | 7260    |
| chr2  | 74145133  | 74145843  | 1.7 | ATZ  | 4930441J16Rik  | Atp5g3        | 395782  | Lnp           | 207051  |
| chr2  | 41350136  | 41351239  | 1.7 | ATZ  | Lrp1b Mir684-1 | Ppp6c         | 2268278 | Kynu          | 2059610 |
| chr7  | 46570637  | 46571072  | 1.7 | ATZ  | NA             | Gm21276       | 50733   | Gm5114        | 91592   |
| chr10 | 76920427  | 76921708  | 1.7 | ATZ  | NA             | Gm17769       | 36743   | Fam207a       | 27692   |
| chr8  | 94093291  | 94095124  | 1.7 | ATZ  | Fto            | Rpgrip1l      | 256170  | Irx3          | 227286  |
| chr8  | 84730718  | 84732474  | 1.7 | ATZ  | NA             | Inpp4b        | 84258   | Il15          | 123049  |
| chr5  | 39239690  | 39240402  | 1.7 | ATZ  | Clnk           | Zfp518b       | 163625  | 4930513D17Rik | 612586  |
| chr5  | 5076030   | 5076398   | 1.7 | ATZ  | Cdk14          | Fzd1          | 317814  | 1700015F17Rik | 361429  |

|       |           |           |     |      |               |               |         |               |         |
|-------|-----------|-----------|-----|------|---------------|---------------|---------|---------------|---------|
| chr2  | 146113613 | 146115587 | 1.7 | ATZ  | Ralgapa2      | A930019D19Rik | 20717   | 4933406D12Rik | 253080  |
| chr14 | 15942542  | 15943519  | 1.7 | ATZ  | NA            | Nek10         | 103335  | Lrrc3b        | 246512  |
| chr10 | 70409180  | 70409842  | 1.7 | cont | Bicc1         | D630013N20Rik | 290469  | C730027H18Rik | 221643  |
| chr7  | 53682403  | 53683553  | 1.7 | ATZ  | Kcnc1         | Myod1         | 47941   | Sergef        | 14976   |
| chr6  | 6243671   | 6244169   | 1.7 | ATZ  | NA            | Slc25a13      | 76498   | Shfm1         | 264106  |
| chr11 | 11364223  | 11364954  | 1.7 | ATZ  | NA            | Zpbp          | 1801    | 4930415F15Rik | 24315   |
| chr4  | 84509387  | 84510265  | 1.7 | ATZ  | NA            | Bnc2          | 188397  | Cntln         | 19966   |
| chr14 | 45120024  | 45120479  | 1.7 | ATZ  | BC061237      | 1700047E10Rik | 329122  | Gm8267        | 216363  |
| chr7  | 74187318  | 74189756  | 1.7 | ATZ  | Adamts17      | Cers3         | 218740  | Lysmd4        | 177674  |
| chr15 | 51829878  | 51832906  | 1.7 | ATZ  | NA            | Rad21         | 6572    | Aard          | 38747   |
| chr12 | 65048892  | 65050025  | 1.7 | ATZ  | NA            | Lrfn5         | 2102647 | Fscb          | 522295  |
| chr5  | 20149397  | 20150712  | 1.7 | ATZ  | Magi2         | Gnai1         | 2283166 | Phtf2         | 113770  |
| chr2  | 68494659  | 68497174  | 1.7 | ATZ  | 4932414N04Rik | 4933409G03Rik | 40139   | Cers6         | 202440  |
| chr2  | 65107486  | 65108183  | 1.7 | ATZ  | Mir684-1      | Cobll1        | 30803   | Slc38a11      | 46507   |
| chr5  | 84241499  | 84242309  | 1.7 | ATZ  | NA            | Tecrl         | 457279  | Epha5         | 241479  |
| chr9  | 67542172  | 67543343  | 1.7 | ATZ  | NA            | Tln2          | 134662  | C2cd4b        | 63901   |
| chr17 | 22655565  | 22656648  | 1.7 | ATZ  | NA            | Zfp946        | 61909   | Vmn2r111      | 28260   |
| chr13 | 112277401 | 112278213 | 1.7 | ATZ  | Gpbp1         | Actbl2        | 229444  | Mier3         | 198173  |
| chr3  | 28792548  | 28794186  | 1.7 | ATZ  | Gm1527        | Rpl22l1       | 86211   | Egfem1        | 187313  |
| chr16 | 9035020   | 9036278   | 1.7 | ATZ  | NA            | 1810013L24Rik | 176003  | Grin2a        | 541525  |
| chr5  | 79011809  | 79012603  | 1.7 | ATZ  | NA            | Pea15b        | 1071036 | Lphn3         | 2438015 |
| chr8  | 68943451  | 68944005  | 1.7 | ATZ  | March1        | BC030870      | 1290015 | Tma16         | 56240   |
| chr14 | 99488842  | 99489368  | 1.7 | ATZ  | Dis3          | Bora          | 15516   | Pibf1         | 9284    |
| chr6  | 40878942  | 40880372  | 1.7 | ATZ  | 1700074P13Rik | Prss58        | 28556   | 1810009J06Rik | 34399   |
| chr17 | 46469000  | 46469865  | 1.7 | ATZ  | NA            | Abcc10        | 4028    | Zfp318        | 50850   |
| chr17 | 38088958  | 38089459  | 1.7 | ATZ  | Olfr761       | Olfr128       | 27519   | Olfr129       | 102085  |
| chr3  | 135213575 | 135213834 | 1.7 | ATZ  | Manba         | Ube2d3        | 83433   | Nfkb1         | 33785   |
| chr11 | 72423270  | 72423799  | 1.7 | ATZ  | Ube2g1        | Spns3         | 59522   | Ankfy1        | 79705   |
| chr4  | 34501000  | 34501901  | 1.7 | ATZ  | Akirin2       | Spaca1        | 363958  | Orc3          | 12129   |
| chr17 | 62796310  | 62798491  | 1.7 | ATZ  | NA            | Nudt12        | 3643565 | Efna5         | 153815  |
| chr13 | 95317580  | 95319459  | 1.7 | ATZ  | Ap3b1         | Gm9776        | 188702  | Tbca          | 239439  |
| chr10 | 70412049  | 70413235  | 1.6 | ATZ  | Bicc1         | D630013N20Rik | 293338  | C730027H18Rik | 218250  |
| chr7  | 48409328  | 48409749  | 1.6 | ATZ  | NA            | Gm4884        | 108656  | Gm5592        | 129948  |
| chr11 | 74744736  | 74745811  | 1.6 | ATZ  | Smg6          | Srr           | 5436    | Hic1          | 232256  |
| chr6  | 127749306 | 127749457 | 1.6 | cont | NA            | Prmt8         | 30129   | Tspan11       | 88183   |
| chr12 | 17613628  | 17613934  | 1.6 | ATZ  | NA            | Odc1          | 55320   | Hpcal1        | 83686   |
| chr13 | 8856679   | 8858877   | 1.6 | ATZ  | Wdr37         | Adarb2        | 97125   | Idi1          | 25975   |
| chr2  | 16838314  | 16839115  | 1.6 | ATZ  | NA            | Plxdc2        | 164572  | 4930515L03Rik | 1190    |
| chr16 | 58719238  | 58719934  | 1.6 | ATZ  | NA            | Gpr15         | 401     | Cldn25        | 8089    |
| chr13 | 49999668  | 50000245  | 1.6 | ATZ  | NA            | lars          | 170032  | Gm906         | 340305  |
| chr13 | 76408015  | 76408452  | 1.6 | ATZ  | NA            | Ttc37         | 82584   | Mctp1         | 113957  |
| chr5  | 8178113   | 8178615   | 1.6 | ATZ  | Adam22        | Sri           | 108868  | Dbf4          | 218354  |
| chr16 | 4658820   | 4659610   | 1.6 | ATZ  | Coro7         | Vasn          | 7654    | Dnaja3        | 24460   |
| chr6  | 116537492 | 116539733 | 1.6 | ATZ  | NA            | Olfr215       | 4530    | Zfp422        | 34301   |
| chr8  | 60007688  | 60008195  | 1.6 | ATZ  | Galnt7        | Hmgb2         | 12892   | AW046200      | 122355  |
| chr3  | 107350845 | 107351688 | 1.6 | ATZ  | NA            | Slc6a17       | 29909   | Ubl4b         | 4928    |
| chr2  | 80475903  | 80476675  | 1.6 | ATZ  | NA            | Dusp19        | 4085    | Nup35         | 2294    |
| chr5  | 134825120 | 134825489 | 1.6 | ATZ  | NA            | Gtf2i         | 34504   | Gtf2ird1      | 8042    |
| chr7  | 142448929 | 142450184 | 1.6 | ATZ  | NA            | 1700120G07Rik | 61244   | Nps           | 10118   |
| chr14 | 24937827  | 24938301  | 1.6 | ATZ  | NA            | Kcnma1        | 114400  | Dlg5          | 14874   |
| chr9  | 13105243  | 13106913  | 1.6 | ATZ  | 4930568E12Rik | Cntn5         | 3120999 | Phxr4         | 127668  |
| chr1  | 120331257 | 120332801 | 1.6 | ATZ  | Clasp1        | Mki67ip       | 100849  | 2900060B14Rik | 22445   |

|       |           |           |     |      |                 |               |         |               |         |
|-------|-----------|-----------|-----|------|-----------------|---------------|---------|---------------|---------|
| chr5  | 107350031 | 107350874 | 1.6 | ATZ  | Hfm1            | Zfp644        | 224182  | Cdc7          | 42467   |
| chr5  | 88406205  | 88407873  | 1.6 | ATZ  | 1700066N21Rik   | Csn3          | 44916   | Cabs1         | 603     |
| chr11 | 74574346  | 74575455  | 1.6 | ATZ  | NA              | Pafah1b1      | 36460   | Mettl16       | 8910    |
| chr13 | 21530870  | 21531309  | 1.6 | ATZ  | Pgbd1           | Zkscan3       | 36246   | Zscan26       | 2735    |
| chr8  | 44611514  | 44612333  | 1.6 | ATZ  | Adam26b         | Zfp42         | 219151  | Adam26a       | 41297   |
| chr14 | 20237394  | 20237681  | 1.6 | ATZ  | NA              | Ube2e2        | 511253  | Gm5458        | 175679  |
| chr9  | 83137753  | 83139451  | 1.6 | ATZ  | NA              | Hmgn3         | 97539   | Lca5          | 145511  |
| chr16 | 69877225  | 69878723  | 1.6 | ATZ  | NA              | Speer2        | 13236   | Gbe1          | 435471  |
| chr6  | 57552754  | 57553137  | 1.6 | ATZ  | Herc6           | Ppm1k         | 67334   | Pyurf         | 81596   |
| chr13 | 94992671  | 94993215  | 1.6 | ATZ  | Scamp1          | Lhfpl2        | 27307   | Gm9776        | 133489  |
| chr9  | 43873127  | 43873502  | 1.6 | ATZ  | NA              | Thy1          | 16465   | Usp2          | 1602    |
| chr5  | 134606521 | 134606885 | 1.6 | ATZ  | Gatsl2          | Auts2         | 1588308 | Wbscr16       | 17043   |
| chr4  | 22864951  | 22866296  | 1.6 | ATZ  | NA              | Pou3f2        | 449438  | Mms22l        | 1557313 |
| chr7  | 28759663  | 28760232  | 1.6 | ATZ  | Zfp780b         | 1700049G17Rik | 45214   | Gm4636        | 9258    |
| chr14 | 8949459   | 8950279   | 1.6 | ATZ  | Pxk             | Rpp14         | 25099   | Pdhb          | 48226   |
| chr5  | 74431394  | 74432548  | 1.6 | ATZ  | Usp46           | Spata18       | 360671  | Dancr         | 56560   |
| chr1  | 44230172  | 44232146  | 1.6 | ATZ  | Ercc5           | Bivm          | 28556   | Mettl21e      | 28769   |
| chr16 | 52830168  | 52831144  | 1.6 | ATZ  | NA              | 4930404A05Rik | 14311   | Zpld1         | 2394144 |
| chr1  | 120332946 | 120334062 | 1.6 | ATZ  | Clasp1          | Mki67ip       | 102538  | 2900060B14Rik | 21184   |
| chr8  | 10252032  | 10253526  | 1.6 | ATZ  | Myo16           | Tnfsf13b      | 216033  | B930025P03Rik | 616896  |
| chr17 | 45163975  | 45164490  | 1.6 | ATZ  | Supt3           | 4930564C03Rik | 146141  | Cdc5l         | 364349  |
| chr19 | 49162662  | 49163903  | 1.6 | ATZ  | NA              | Sorcs3        | 282667  | Sorcs1        | 1053888 |
| chr8  | 46680457  | 46682056  | 1.6 | ATZ  | Sorbs2          | Tlr3          | 184564  | D330022K07Rik | 126623  |
| chr1  | 166393413 | 166394153 | 1.6 | ATZ  | NA              | Atp1b1        | 4927    | Dpt           | 332710  |
| chr10 | 87824865  | 87826154  | 1.6 | ATZ  | NA              | Dram1         | 5045    | Gnptab        | 16003   |
| chr5  | 120774856 | 120777230 | 1.6 | ATZ  | NA              | Rbm19         | 125876  | Lhx5          | 104665  |
| chr14 | 108037820 | 108038686 | 1.6 | ATZ  | NA              | 1700128A07Rik | 1152119 | Slitrk1       | 1270520 |
| chr4  | 41812954  | 41813176  | 1.6 | cont | Ccl21b Ccl21c G | Ccl27a        | 91905   | Gm13298       | 23608   |
| chr6  | 82626168  | 82626993  | 1.6 | ATZ  | NA              | Pole4         | 23309   | Hk2           | 48028   |
| chr8  | 90696788  | 90698048  | 1.6 | ATZ  | NA              | Heatr3        | 946     | Papd5         | 25064   |
| chr14 | 39058166  | 39059289  | 1.6 | ATZ  | NA              | Ghitm         | 1109658 | Nrg3          | 122848  |
| chr6  | 12368862  | 12370122  | 1.6 | ATZ  | Thsd7a          | Gm6578        | 309282  | Tmem106b      | 649637  |
| chr14 | 68721030  | 68722113  | 1.6 | ATZ  | NA              | Nefl          | 15236   | Nefm          | 15489   |
| chr10 | 66648327  | 66649130  | 1.6 | ATZ  | Jmjd1c          | Reep3         | 88591   | Nrbf2         | 80307   |
| chrX  | 43644518  | 43646823  | 1.6 | ATZ  | 4930515L19Rik   | 1110059M19Rik | 1198551 | Actrt1        | 35361   |
| chr14 | 38419541  | 38420588  | 1.6 | ATZ  | NA              | Ghitm         | 471033  | Nrg3          | 761549  |
| chr8  | 9130192   | 9132700   | 1.6 | ATZ  | 4933430N04Rik   | Arglu1        | 439655  | 4930453L07Rik | 11969   |
| chr16 | 5371790   | 5372387   | 1.6 | ATZ  | NA              | Fam86         | 115741  | Rbfox1        | 512499  |
| chr2  | 150953111 | 150953355 | 1.6 | ATZ  | NA              | Gm14151       | 23566   | 4930442J19Rik | 174420  |
| chr1  | 53026378  | 53028680  | 1.6 | ATZ  | NA              | 1700019D03Rik | 16694   | Mstn          | 89827   |
| chr12 | 52682405  | 52682696  | 1.6 | ATZ  | NA              | Scfd1         | 131322  | Coch          | 11632   |
| chr10 | 74480164  | 74481999  | 1.6 | ATZ  | Rtdr1           | Gnaz          | 1542    | Rab36         | 17835   |
| chr11 | 97717320  | 97718508  | 1.6 | ATZ  | Fbxo47          | B230217C12Rik | 12963   | Plxdc1        | 66043   |
| chr9  | 41693469  | 41696705  | 1.6 | ATZ  | NA              | 2610203C20Rik | 292899  | Sorl1         | 79867   |
| chr10 | 87826393  | 87828103  | 1.6 | ATZ  | NA              | Dram1         | 6573    | Gnptab        | 14054   |
| chr18 | 68632270  | 68632851  | 1.6 | ATZ  | NA              | Mc2r          | 43296   | 4930546C10Rik | 416290  |
| chr3  | 152605501 | 152607236 | 1.6 | ATZ  | St6galnac5      | Pigk          | 153524  | St6galnac3    | 258237  |
| chr13 | 104613543 | 104614517 | 1.6 | ATZ  | Erbp2ip         | Srek1         | 58881   | Nln           | 199002  |
| chr7  | 66399861  | 66400855  | 1.6 | ATZ  | NA              | Atp10a        | 315065  | Ube3a         | 83265   |
| chr13 | 118030868 | 118031963 | 1.6 | ATZ  | Emb             | Gm6416        | 106177  | Hcn1          | 359164  |
| chr1  | 36949934  | 36950875  | 1.6 | ATZ  | Tmem131         | Zap70         | 110273  | Cnga3         | 325231  |
| chr4  | 9843506   | 9845081   | 1.6 | ATZ  | 4930448K20Rik   | Gdf6          | 54014   | 1700123O12Rik | 590097  |

|       |           |           |     |      |                        |               |         |               |         |
|-------|-----------|-----------|-----|------|------------------------|---------------|---------|---------------|---------|
| chr15 | 19323881  | 19325737  | 1.6 | ATZ  | NA                     | Cdh10         | 379892  | Acot10        | 1269232 |
| chr11 | 48153968  | 48154521  | 1.6 | ATZ  | NA                     | Sgcd          | 961164  | Gnb2l1        | 459341  |
| chr6  | 20918577  | 20920432  | 1.6 | ATZ  | NA                     | Ankrd7        | 2088993 | Kcnd2         | 245677  |
| chr1  | 75328604  | 75329190  | 1.6 | ATZ  | NA                     | Dnpep         | 14392   | Des           | 27729   |
| chr10 | 114385442 | 114386711 | 1.6 | ATZ  | NA                     | Trhde         | 147016  | Tph2          | 128986  |
| chr5  | 31652113  | 31653775  | 1.6 | ATZ  | NA                     | Gckr          | 22438   | Zfp512        | 101034  |
| chr2  | 21990672  | 21991106  | 1.6 | ATZ  | NA                     | Gpr158        | 238503  | Myo3a         | 158024  |
| chr1  | 139862747 | 139865400 | 1.6 | ATZ  | Mir181a-1<br>Mir181b-1 | Nr5a2         | 1005722 | Ptpcr         | 94036   |
| chr3  | 6135400   | 6135726   | 1.6 | ATZ  | NA                     | Pex2          | 559152  | 1700008P02Rik | 479687  |
| chr9  | 54029137  | 54032749  | 1.6 | ATZ  | Cyp19a1                | Tnfaip8l3     | 112919  | 1700104A03Rik | 83638   |
| chr2  | 41148892  | 41149310  | 1.6 | ATZ  | Lrp1b Mir684-1         | Ppp6c         | 2067034 | Kynu          | 2261539 |
| chr10 | 18505419  | 18505982  | 1.6 | ATZ  | Gm4922                 | D10Bwg1379e   | 41855   | 4930444F02Rik | 11123   |
| chr14 | 69945546  | 69947016  | 1.6 | cont | NA                     | Synb          | 33190   | Gm16677       | 748     |
| chr1  | 98209645  | 98211343  | 1.6 | ATZ  | NA                     | 1700063A18Rik | 291310  | 4930533P14Rik | 297291  |
| chr11 | 22240512  | 22242795  | 1.6 | ATZ  | NA                     | Ehbp1         | 53714   | Tmem17        | 169491  |
| chr12 | 82477513  | 82478815  | 1.6 | ATZ  | Gm4787                 | Slc8a3        | 43346   | Adam4         | 41721   |
| chr3  | 112453294 | 112453967 | 1.6 | ATZ  | NA                     | Gm6602        | 568375  | Amy2b         | 496607  |
| chr17 | 21196609  | 21196852  | 1.6 | ATZ  | NA                     | Zfp160        | 30789   | Vmn1r234      | 168938  |
| chr2  | 180448493 | 180449788 | 1.6 | ATZ  | Gid8                   | Dido1         | 3789    | Slc17a9       | 10256   |
| chr8  | 68941269  | 68941744  | 1.6 | ATZ  | March1                 | BC030870      | 1287833 | Tma16         | 58501   |
| chr5  | 43353841  | 43354778  | 1.6 | ATZ  | NA                     | Bod1l         | 1118287 | Gm7854        | 188147  |
| chr5  | 99931672  | 99932974  | 1.6 | ATZ  | NA                     | Rasgef1b      | 249726  | A930011G23Rik | 224789  |
| chr12 | 97900104  | 97901520  | 1.6 | ATZ  | NA                     | 1700019M22Rik | 614672  | Galc          | 1538990 |
| chr3  | 31587088  | 31588012  | 1.6 | ATZ  | NA                     | Slc7a14       | 377847  | Kcnmb2        | 213613  |
| chr17 | 55786056  | 55787477  | 1.6 | ATZ  | NA                     | Vmn2r118      | 22086   | Pot1b         | 3846    |
| chr1  | 56075363  | 56076486  | 1.6 | ATZ  | NA                     | 9130227L01Rik | 46421   | Hsfy2         | 616407  |
| chr12 | 16678833  | 16679902  | 1.6 | ATZ  | Greb1                  | Ntsr2         | 11791   | E2f6          | 137869  |
| chr1  | 37551357  | 37551905  | 1.6 | ATZ  | Mgat4a                 | 4930594C11Rik | 5907    | 2010300C02Rik | 116616  |
| chr2  | 14440276  | 14440729  | 1.6 | ATZ  | NA                     | Slc39a12      | 23672   | Cacnb2        | 85204   |
| chr7  | 90858891  | 90859704  | 1.6 | ATZ  | Il16                   | Stard5        | 68053   | 1700026D08Rik | 64423   |
| chr10 | 113304846 | 113305486 | 1.6 | ATZ  | NA                     | Atxn7l3b      | 938764  | Trhde         | 530391  |
| chr1  | 178683009 | 178684995 | 1.6 | ATZ  | Cep170                 | Pld5          | 477566  | Mir350        | 17461   |
| chrX  | 73630557  | 73631572  | 1.6 | ATZ  | NA                     | Gm4937        | 117545  | 4930428D18Rik | 7117    |
| chr9  | 18201386  | 18202465  | 1.6 | ATZ  | NA                     | Naalad2       | 11014   | Ubtfl1        | 6397    |
| chr13 | 63535647  | 63537044  | 1.6 | ATZ  | NA                     | Fancc         | 2594    | Ptch1         | 75797   |
| chr18 | 37096578  | 37096895  | 1.6 | ATZ  | Pcdha1                 | Gm6756        | 14717   | Pcdha2        | 1964    |
| chr2  | 169211582 | 169212945 | 1.6 | ATZ  | NA                     | 1700017J07Rik | 407176  | Tshz2         | 246201  |
| chr11 | 52001398  | 52001672  | 1.6 | ATZ  | NA                     | Olfr1372-ps1  | 29989   | Olfr1371      | 24882   |
| chr14 | 30174836  | 30175968  | 1.6 | ATZ  | Cacna2d3               | Lrtm1         | 328008  | Selk          | 605598  |
| chr7  | 112561108 | 112563264 | 1.6 | ATZ  | NA                     | Cnga4         | 3856    | Cckbr         | 11070   |
| chr13 | 59662098  | 59662989  | 1.6 | ATZ  | NA                     | Agtbp1        | 3418    | A230056J06Rik | 18548   |
| chr14 | 40893330  | 40894320  | 1.6 | ATZ  | NA                     | 1700109I08Rik | 394749  | Sh2d4b        | 734837  |
| chr10 | 86003246  | 86004212  | 1.6 | ATZ  | NA                     | Syn3          | 41605   | 1810014B01Rik | 144060  |
| chr10 | 18379500  | 18380762  | 1.6 | ATZ  | D10Bwg1379e            | Hebp2         | 113618  | Gm4922        | 118771  |
| chr5  | 145803958 | 145804158 | 1.6 | ATZ  | 1700018F24Rik          | Gm4871        | 10325   | Arpc1a        | 40580   |
| chr2  | 65104578  | 65106311  | 1.6 | ATZ  | Mir684-1               | Cobll1        | 27895   | Slc38a11      | 48379   |
| chr13 | 34831407  | 34832525  | 1.6 | ATZ  | Fam50b                 | Pxdc1         | 86857   | Prpf4b        | 134838  |
| chr9  | 79086113  | 79086819  | 1.6 | ATZ  | NA                     | Cd109         | 522046  | Gm10635       | 205025  |
| chr18 | 9099216   | 9100050   | 1.6 | ATZ  | NA                     | Wac           | 1170191 | Fzd8          | 112804  |
| chr2  | 91409914  | 91412149  | 1.6 | ATZ  | Ckap5                  | Lrp4          | 55856   | Snord67       | 24089   |
| chr16 | 89218841  | 89220386  | 1.6 | ATZ  | NA                     | Krtap20-2     | 12202   | Krtap21-1     | 182886  |

|       |           |           |     |      |               |               |         |               |         |
|-------|-----------|-----------|-----|------|---------------|---------------|---------|---------------|---------|
| chr5  | 99936364  | 99941799  | 1.6 | ATZ  | NA            | Rasgef1b      | 254418  | A930011G23Rik | 215964  |
| chr5  | 122963541 | 122965172 | 1.6 | ATZ  | NA            | Atp2a2        | 11307   | lft81         | 35041   |
| chr12 | 101394420 | 101396363 | 1.6 | ATZ  | Nrde2         | Psmc1         | 32846   | Gm10433       | 29815   |
| chr9  | 67271644  | 67272791  | 1.6 | ATZ  | Tln2          | Mir190        | 187111  | C2cd4b        | 334453  |
| chr2  | 14438803  | 14440215  | 1.6 | ATZ  | NA            | Slc39a12      | 22199   | Cacnb2        | 85718   |
| chr7  | 59270117  | 59273916  | 1.6 | ATZ  | 1700015G11Rik | Svip          | 8729    | Luzp2         | 2816699 |
| chrX  | 6646464   | 6648080   | 1.6 | ATZ  | Akap4         | Ccnb3         | 27719   | Clcn5         | 87458   |
| chr6  | 85851209  | 85852966  | 1.6 | ATZ  | 1700019G17Rik | Cml2          | 32078   | Cml1          | 7182    |
| chr1  | 47001556  | 47001892  | 1.6 | ATZ  | NA            | Slc39a10      | 91202   | Tmeff2        | 3982475 |
| chr4  | 153950493 | 153951283 | 1.6 | ATZ  | Prdm16        | Arhgef16      | 276489  | 5930403L14Rik | 53517   |
| chr18 | 52805133  | 52808718  | 1.6 | ATZ  | 1700034E13Rik | Zfp474        | 5649    | Gykl1         | 44615   |
| chr11 | 73009115  | 73009904  | 1.6 | ATZ  | Ctns          | Tax1bp3       | 13567   | Shpk          | 3080    |
| chrX  | 108305850 | 108307063 | 1.6 | ATZ  | Cylc1         | Pou3f4        | 294961  | Rps6ka6       | 194738  |
| chr1  | 136444842 | 136447126 | 1.6 | ATZ  | NA            | 4931440L10Rik | 1243    | Kdm5b         | 9629    |
| chr11 | 52401493  | 52402567  | 1.6 | ATZ  | NA            | 9530068E07Rik | 179268  | Fstl4         | 175641  |
| chr6  | 124321395 | 124323904 | 1.6 | ATZ  | NA            | 1700013D24Rik | 14291   | Pex5          | 22930   |
| chr2  | 180468358 | 180468938 | 1.6 | ATZ  | Slc17a9       | Gid8          | 15136   | Bhlhe23       | 40148   |
| chr4  | 12338454  | 12340968  | 1.6 | ATZ  | NA            | Fam92a        | 239292  | Triqk         | 493016  |
| chr12 | 52511919  | 52512887  | 1.6 | ATZ  | Scfd1         | G2e3          | 33946   | Coch          | 181441  |
| chr13 | 111358642 | 111360026 | 1.6 | ATZ  | NA            | Plk2          | 167591  | 3110015C05Rik | 641651  |
| chr6  | 49058374  | 49062140  | 1.6 | ATZ  | Igf2bp3       | Malsu1        | 23658   | Tra2a         | 131780  |
| chr1  | 61896744  | 61898503  | 1.6 | ATZ  | Pard3b        | 9530026F06Rik | 443996  | Nrp2          | 851388  |
| chr12 | 55595247  | 55596187  | 1.6 | ATZ  | NA            | Gm7550        | 102942  | Sptssa        | 150174  |
| chr1  | 44135221  | 44137021  | 1.6 | ATZ  | NA            | Mettl21c      | 58370   | Tex30         | 6441    |
| chr16 | 9036426   | 9036980   | 1.6 | ATZ  | NA            | 1810013L24Rik | 177409  | Grin2a        | 540823  |
| chr4  | 88083525  | 88085293  | 1.6 | ATZ  | Ptplad2       | Focad         | 26610   | Ifnb1         | 82636   |
| chr11 | 113033560 | 113034397 | 1.6 | ATZ  | 2610035D17Rik | Sox9          | 384489  | 4732490B19Rik | 30232   |
| chr4  | 114058845 | 114062625 | 1.6 | ATZ  | NA            | Skint11       | 141212  | Trabd2b       | 16704   |
| chr15 | 46453727  | 46455632  | 1.6 | ATZ  | 4930548G14Rik | 4930523O13Rik | 126002  | Csmd3         | 956552  |
| chr17 | 88042884  | 88046827  | 1.6 | ATZ  | Epcam         | Calm2         | 196609  | Msh2          | 25070   |
| chr10 | 42536242  | 42538212  | 1.6 | ATZ  | Sec63         | Ostm1         | 113974  | Scml4         | 42106   |
| chr8  | 48029942  | 48030864  | 1.6 | cont | NA            | Irf2          | 97130   | Enpp6         | 41415   |
| chr11 | 54342222  | 54345178  | 1.6 | ATZ  | Rapgef6       | Fnip1         | 10479   | Cdc42se2      | 185739  |
| chr5  | 88407937  | 88410039  | 1.6 | ATZ  | 1700066N21Rik | Csn3          | 46648   | Smr3a         | 21511   |
| chr11 | 19781164  | 19782366  | 1.6 | ATZ  | NA            | 4933406G16Rik | 805421  | Spred2        | 42079   |
| chr12 | 55829169  | 55829992  | 1.6 | ATZ  | NA            | Eapp          | 32317   | Snx6          | 17352   |
| chr16 | 77352432  | 77353915  | 1.6 | ATZ  | 2810055G20Rik | Usp25         | 235407  | Mir99a        | 245266  |
| chr17 | 92270629  | 92271539  | 1.6 | ATZ  | NA            | Nrxn1         | 778487  | Adcyap1       | 1327223 |
| chr1  | 3863106   | 3864563   | 1.6 | ATZ  | NA            | Xkr4          | 201527  | Rp1           | 416364  |
| chr11 | 19776886  | 19780305  | 1.6 | ATZ  | NA            | 4933406G16Rik | 801143  | Spred2        | 44140   |
| chr5  | 65669826  | 65671345  | 1.6 | ATZ  | Rfc1          | Wdr19         | 18172   | Klb           | 68305   |
| chr3  | 40420089  | 40420643  | 1.6 | ATZ  | 1700017G19Rik | Fat4          | 1509184 | Intu          | 19046   |
| chr5  | 146165768 | 146167402 | 1.6 | ATZ  | NA            | Cyp3a57       | 14387   | Cyp3a16       | 29776   |
| chr15 | 63929790  | 63931060  | 1.6 | ATZ  | Asap1         | Fam49b        | 37780   | Adcy8         | 599537  |
| chr5  | 5535576   | 5537390   | 1.6 | ATZ  | NA            | Cldn12        | 20600   | Gtpbp10       | 67      |
| chr1  | 163826944 | 163828064 | 1.6 | ATZ  | NA            | Suco          | 20152   | 4930558K02Rik | 44156   |
| chr3  | 127560829 | 127562685 | 1.6 | ATZ  | NA            | Ap1ar         | 20419   | 5730508B09Rik | 9921    |
| chr17 | 53336301  | 53336496  | 1.6 | ATZ  | NA            | Kcnh8         | 214971  | Efhhb         | 201718  |
| chr17 | 89006628  | 89008251  | 1.6 | ATZ  | NA            | Ppp1r21       | 18921   | Ston1         | 17644   |
| chr9  | 106527235 | 106528105 | 1.6 | ATZ  | NA            | Iqcf4         | 53937   | Iqcf6         | 808     |
| chr16 | 80855671  | 80858113  | 1.6 | ATZ  | NA            | Tmprss15      | 1764329 | Ncam2         | 342829  |
| chr13 | 5914743   | 5916150   | 1.6 | ATZ  | NA            | Klf6          | 45104   | Pitrm1        | 631253  |

|       |           |           |     |      |               |               |         |               |         |
|-------|-----------|-----------|-----|------|---------------|---------------|---------|---------------|---------|
| chr4  | 39072668  | 39074341  | 1.6 | ATZ  | NA            | Lingo2        | 2173891 | 1700009N14Rik | 322985  |
| chr16 | 70224317  | 70225132  | 1.6 | ATZ  | NA            | Speer2        | 360328  | Gbe1          | 89062   |
| chr15 | 34063900  | 34064479  | 1.6 | ATZ  | Mtdh          | Tspyl5        | 446262  | Laptm4b       | 103302  |
| chr14 | 44303828  | 44304113  | 1.6 | ATZ  | NA            | Gm10375       | 118150  | Ear1          | 92318   |
| chr17 | 56799050  | 56800042  | 1.6 | ATZ  | Catsperd      | Lonp1         | 32724   | Ranbp3        | 12606   |
| chr5  | 146165101 | 146165570 | 1.6 | ATZ  | NA            | Cyp3a57       | 13720   | Cyp3a16       | 31608   |
| chr14 | 109328532 | 109329494 | 1.6 | ATZ  | NA            | Slitrk1       | 15076   | Slitrk6       | 1818306 |
| chr18 | 33092226  | 33094945  | 1.6 | ATZ  | NA            | Wdr36         | 66152   | Camk4         | 3750    |
| chr1  | 80443685  | 80444454  | 1.6 | ATZ  | 1700016L21Rik | Cul3          | 106680  | Dock10        | 53194   |
| chr14 | 88085314  | 88086646  | 1.6 | ATZ  | NA            | Tdrd3         | 139999  | Pcdh20        | 777908  |
| chr14 | 67794248  | 67797039  | 1.6 | ATZ  | NA            | Ppp2r2a       | 102940  | Ebf2          | 55090   |
| chr8  | 86386142  | 86387026  | 1.6 | cont | NA            | Cd97          | 120932  | Lphn1         | 36971   |
| chr2  | 131259274 | 131261015 | 1.6 | ATZ  | NA            | Rnf24         | 80646   | Smox          | 56583   |
| chr10 | 33311882  | 33312689  | 1.6 | ATZ  | Clvs2         | Trdn          | 115367  | Gm4794        | 173541  |
| chr1  | 166231125 | 166234481 | 1.6 | ATZ  | Blzf1         | 4930455F23Rik | 13147   | Nme7          | 3325    |
| chr10 | 18022229  | 18023433  | 1.6 | ATZ  | NA            | Ccdc28a       | 67442   | Nhs1          | 104048  |
| chr14 | 39709772  | 39712153  | 1.6 | ATZ  | 4930529F24Rik | Ghitm         | 1761264 | 1700109I08Rik | 756798  |
| chr14 | 41880946  | 41883064  | 1.6 | ATZ  | Dydc2         | Fam213a       | 53882   | Dydc1         | 3136    |
| chr2  | 57117256  | 57119105  | 1.6 | ATZ  | Gpd2 Mir684-1 | 4930555B11Rik | 76588   | Galnt5        | 731461  |
| chr2  | 163936298 | 163936894 | 1.6 | ATZ  | Stk4          | Tomm34        | 39460   | Kcns1         | 52461   |
| chr17 | 8358047   | 8358274   | 1.6 | ATZ  | NA            | Rnaset2b      | 17350   | Fgfr1op       | 109     |
| chr5  | 27519210  | 27520168  | 1.6 | ATZ  | Dpp6          | 4930584F24Rik | 699356  | Speer4b       | 302181  |
| chr5  | 39992854  | 39995206  | 1.6 | ATZ  | 4930513D17Rik | Clnk          | 724922  | Hs3st1        | 9968    |
| chr4  | 31107987  | 31109437  | 1.6 | ATZ  | NA            | 4930556G01Rik | 325093  | Map3k7        | 941645  |
| chr17 | 91256505  | 91257806  | 1.6 | ATZ  | Nrxn1         | Gm4719        | 1472172 | 4930480K15Rik | 2703    |
| chr11 | 110013985 | 110017553 | 1.6 | ATZ  | Abca9         | Abca8a        | 56734   | Abca6         | 20583   |
| chr4  | 147749117 | 147752825 | 1.6 | ATZ  | NA            | Ptchd2        | 87043   | Ubiad1        | 55781   |
| chr8  | 24370007  | 24370808  | 1.6 | ATZ  | NA            | Golga7        | 2455    | Sfrp1         | 151166  |
| chr10 | 112163896 | 112165736 | 1.6 | ATZ  | 1700010J16Rik | Kcnc2         | 260536  | Atxn7l3b      | 196748  |
| chr12 | 118256153 | 118256847 | 1.6 | ATZ  | Ptprn2        | Ncapg2        | 554149  | Gm10421       | 126149  |
| chr7  | 137450670 | 137453377 | 1.6 | ATZ  | NA            | Fgfr2         | 40348   | Ate1          | 81631   |
| chr18 | 29601900  | 29602366  | 1.6 | ATZ  | 4930527G23Rik | 4930474G06Rik | 445223  | Pik3c3        | 830184  |
| chr6  | 111535597 | 111536845 | 1.6 | ATZ  | NA            | Grm7          | 18373   | 1700054K19Rik | 623857  |
| chr5  | 103776481 | 103777357 | 1.6 | ATZ  | NA            | 4930429D17Rik | 48433   | Ptpn13        | 76854   |
| chr1  | 177627574 | 177631706 | 1.6 | ATZ  | Wdr64         | Opn3          | 4853    | Exo1          | 179203  |
| chr11 | 58042466  | 58043713  | 1.6 | ATZ  | NA            | Irgm2         | 6181    | Zfp692        | 76858   |
| chr13 | 3600200   | 3600695   | 1.6 | ATZ  | BC016423      | Gdi2          | 34693   | Asb13         | 32583   |
| chr18 | 12475508  | 12477454  | 1.6 | ATZ  | NA            | Ankrd29       | 11279   | Lama3         | 15079   |
| chr8  | 80149017  | 80149879  | 1.6 | ATZ  | 1700092C02Rik | Tmem184c      | 14465   | Ednra         | 37049   |
| chr19 | 43462819  | 43464289  | 1.6 | ATZ  | Hpse2         | Hps1          | 608353  | Cnnm1         | 50637   |
| chr11 | 34407916  | 34408617  | 1.6 | ATZ  | Dock2         | Fam196b       | 85276   | Spdl1         | 214070  |
| chr3  | 68844906  | 68846485  | 1.6 | ATZ  | Trim59        | Smc4          | 6361    | Kpna4         | 29658   |
| chr13 | 20296341  | 20297626  | 1.6 | ATZ  | Elmo1         | Gpr141        | 380215  | Aoah          | 588362  |
| chr15 | 92316941  | 92318248  | 1.6 | ATZ  | Pdzn4         | Cntn1         | 144543  | Gxy1t1        | 751925  |
| chr1  | 92478872  | 92479891  | 1.6 | ATZ  | NA            | Cxcr7         | 366575  | Cops8         | 20109   |
| chr11 | 30473676  | 30474837  | 1.6 | ATZ  | Acyp2         | 4930505A04Rik | 101847  | Psme4         | 196938  |
| chr18 | 74019038  | 74020484  | 1.6 | ATZ  | Mro           | Me2           | 43992   | Mapk4         | 67657   |
| chr14 | 60109522  | 60110640  | 1.6 | ATZ  | Cab39l        | Setdb2        | 49808   | Cdad1         | 67585   |
| chr16 | 85780740  | 85781736  | 1.6 | ATZ  | NA            | Cyyr1         | 230122  | Adamts1       | 12337   |
| chr4  | 101133226 | 101134681 | 1.6 | ATZ  | Ak4           | 0610043K17Rik | 61436   | Dnajc6        | 34572   |
| chr18 | 67939131  | 67940566  | 1.6 | ATZ  | 4930549G23Rik | Ptpn2         | 54856   | Cep192        | 19195   |
| chr15 | 44918078  | 44918502  | 1.6 | ATZ  | NA            | A930017M01Rik | 201789  | Kcnv1         | 19328   |

|       |           |           |     |      |               |               |         |               |         |
|-------|-----------|-----------|-----|------|---------------|---------------|---------|---------------|---------|
| chr15 | 6750434   | 6751473   | 1.6 | ATZ  | NA            | Rictor        | 34      | Osmr          | 12104   |
| chr4  | 129528398 | 129529623 | 1.6 | ATZ  | NA            | Ptp4a2        | 1151    | E330017L17Rik | 53847   |
| chr5  | 17855699  | 17855942  | 1.6 | ATZ  | Gnai1         | Gnat3         | 330213  | Magi2         | 876922  |
| chr19 | 34350846  | 34351468  | 1.6 | ATZ  | NA            | Acta2         | 20983   | Fas           | 13681   |
| chr1  | 179718036 | 179719146 | 1.6 | ATZ  | Adss          | 1700016C15Rik | 34600   | Gm16432       | 202420  |
| chr9  | 65743924  | 65745966  | 1.6 | ATZ  | 2810417H13Rik | Zfp609        | 68553   | Csnk1g1       | 10851   |
| chr8  | 93683948  | 93686295  | 1.6 | ATZ  | NA            | Aktip         | 24553   | Rpgrip1l      | 54634   |
| chr17 | 33527002  | 33527816  | 1.6 | ATZ  | Zfp101        | Zfp81         | 31179   | Actl9         | 42028   |
| chr16 | 78693995  | 78696231  | 1.6 | ATZ  | NA            | D16Ertd472e   | 117062  | Chodl         | 234962  |
| chr6  | 116626598 | 116627142 | 1.6 | cont | NA            | Rassf4        | 2744    | Tmem72        | 15601   |
| chr4  | 146772593 | 146772876 | 1.6 | ATZ  | Gm13152       | Znf41-ps      | 215869  | Gm13154       | 154510  |
| chr18 | 62736124  | 62737834  | 1.6 | ATZ  | Spink10       | Fbxo38        | 27727   | Spink7        | 14233   |
| chr17 | 72086420  | 72086985  | 1.6 | ATZ  | NA            | Fam179a       | 7411    | BC027072      | 5910    |
| chr15 | 92151946  | 92153755  | 1.6 | ATZ  | Cntn1         | Muc19         | 386960  | Pdzrn4        | 73486   |
| chr3  | 40828205  | 40830119  | 1.6 | ATZ  | NA            | Larp1b        | 46490   | Pgrmc2        | 40129   |
| chr6  | 120887740 | 120890151 | 1.6 | ATZ  | Mical3        | Bid           | 20902   | Pex26         | 243534  |
| chr18 | 3308528   | 3310750   | 1.6 | ATZ  | Crem          | Vmn1r238      | 185116  | Gm6225        | 25664   |
| chr17 | 70271616  | 70273437  | 1.6 | ATZ  | NA            | A330050F15Rik | 433043  | Dlgap1        | 500695  |
| chr1  | 23913723  | 23918723  | 1.6 | ATZ  | Smap1         | B3gat2        | 59026   | 1110058L19Rik | 84055   |
| chr6  | 100709918 | 100711585 | 1.6 | ATZ  | Gxytl2        | Shq1          | 88767   | Ppp4r2        | 72047   |
| chr17 | 54090728  | 54092206  | 1.6 | ATZ  | NA            | Sult1c2       | 105445  | Sult1c1       | 8734    |
| chr7  | 134759875 | 134760736 | 1.6 | ATZ  | NA            | Zfp629        | 1928    | Bcl7c         | 87756   |
| chr7  | 91899350  | 91899655  | 1.6 | ATZ  | 2610206C17Rik | Zfand6        | 71489   | Olfr291       | 102426  |
| chr10 | 41752122  | 41753478  | 1.6 | ATZ  | NA            | Armc2         | 13934   | Foxo3         | 152114  |
| chr9  | 103106302 | 103106930 | 1.6 | ATZ  | NA            | Srprb         | 1907    | Trf           | 4276    |
| chr10 | 66651827  | 66652297  | 1.6 | ATZ  | Jmjd1c        | Reep3         | 92091   | Nrbf2         | 77140   |
| chr17 | 51018412  | 51019064  | 1.6 | ATZ  | Tbc1d5        | Plcl2         | 190593  | C330011F03Rik | 545470  |
| chr1  | 179738679 | 179738958 | 1.6 | ATZ  | NA            | Adss          | 12039   | Gm16432       | 182608  |
| chr13 | 99632264  | 99634279  | 1.6 | ATZ  | Tnp01         | Fcho2         | 46860   | 1700024P04Rik | 119766  |
| chr1  | 73068851  | 73070239  | 1.6 | ATZ  | 1700027A15Rik | Tnp1          | 6378    | Pinc          | 367720  |
| chr6  | 101148078 | 101149384 | 1.6 | ATZ  | Pdzrn3        | Ppp4r2        | 329367  | Gm9871        | 574859  |
| chr6  | 57428432  | 57428732  | 1.6 | ATZ  | NA            | Vmn1r20       | 45836   | Ppm1k         | 27764   |
| chr17 | 47805248  | 47806057  | 1.6 | ATZ  | Usp49         | Med20         | 43881   | Tomm6         | 17537   |
| chr1  | 121831354 | 121833990 | 1.5 | ATZ  | Gm101         | Tmem177       | 21609   | Sctr          | 69567   |
| chr5  | 22196284  | 22197114  | 1.5 | ATZ  | NA            | Orc5          | 140135  | A930003O13Rik | 47615   |
| chr3  | 35560908  | 35562973  | 1.5 | ATZ  | Gm6639        | Gm3143        | 945324  | Atp11b        | 90087   |
| chr15 | 94721788  | 94722841  | 1.5 | ATZ  | Tmem117       | Twf1          | 301533  | LOC100043315  | 205212  |
| chr17 | 66124831  | 66127833  | 1.5 | ATZ  | NA            | Rab31         | 2739    | Ppp4r1        | 4862    |
| chrY  | 1425238   | 1426447   | 1.5 | ATZ  | Zfy2          | Usp9y         | 629013  | Gm16501 Gm60  | 428562  |
| chr6  | 119827101 | 119827825 | 1.5 | ATZ  | NA            | 3110021A11Rik | 28067   | Rad52         | 24891   |
| chr6  | 42963463  | 42964676  | 1.5 | ATZ  | NA            | Olfr444       | 57032   | Olfr441       | 101067  |
| chr1  | 43443259  | 43444640  | 1.5 | ATZ  | NA            | Fhl2          | 222453  | Nck2          | 57956   |
| chr15 | 32997644  | 33001375  | 1.5 | ATZ  | NA            | Sdc2          | 33168   | Cpq           | 11509   |
| chr1  | 102147573 | 102150583 | 1.5 | ATZ  | Cntnap5b      | Slco6d1       | 1741616 | Gm20268       | 901762  |
| chr13 | 56697328  | 56699001  | 1.5 | ATZ  | NA            | Lect2         | 47429   | Tgfb1         | 11963   |
| chr1  | 73070386  | 73075293  | 1.5 | ATZ  | 1700027A15Rik | Tnp1          | 7913    | Pinc          | 362666  |
| chr6  | 75365232  | 75366425  | 1.5 | ATZ  | NA            | 4931417E11Rik | 1945571 | Ctnna2        | 1465206 |
| chr11 | 43163888  | 43168383  | 1.5 | ATZ  | NA            | Atp10b        | 88101   | Mir146        | 19516   |
| chr3  | 126764873 | 126765134 | 1.5 | ATZ  | NA            | Ank2          | 63503   | Larp7         | 474498  |
| chr3  | 87800724  | 87801493  | 1.5 | cont | Bcan          | Nes           | 16351   | Hapln2        | 24179   |
| chr14 | 51576098  | 51577107  | 1.5 | ATZ  | Pnp2          | Pnp           | 3011    | Rnase10       | 50319   |
| chr16 | 91114834  | 91115707  | 1.5 | ATZ  | NA            | 4932438H23Rik | 45444   | Olig2         | 110088  |

|       |           |           |     |     |                  |               |         |               |         |
|-------|-----------|-----------|-----|-----|------------------|---------------|---------|---------------|---------|
| chr8  | 68942164  | 68943361  | 1.5 | ATZ | March1           | BC030870      | 1288728 | Tma16         | 56884   |
| chr9  | 99758152  | 99759659  | 1.5 | ATZ | NA               | Cldn18        | 140466  | Sox14         | 14866   |
| chr6  | 58533179  | 58534481  | 1.5 | ATZ | NA               | Vmn1r31       | 110307  | Abcg2         | 12185   |
| chr5  | 15219200  | 15219659  | 1.5 | ATZ | Speer7-ps1       | 4930572O03Rik | 56323   | 4930519H02Rik | 150087  |
| chr14 | 52314452  | 52314908  | 1.5 | ATZ | NA               | Gm5622        | 31824   | Gm5800        | 16411   |
| chr3  | 6138058   | 6141087   | 1.5 | ATZ | NA               | Pex2          | 561810  | 1700008P02Rik | 474326  |
| chr5  | 31786214  | 31789316  | 1.5 | ATZ | 4930548H24Rik    | Zfp512        | 2088    | Gpn1          | 7818    |
| chr12 | 52529990  | 52531701  | 1.5 | ATZ | Scfd1            | G2e3          | 52017   | Coch          | 162627  |
| chr7  | 36323530  | 36324115  | 1.5 | ATZ | NA               | Tdrd12        | 767     | Nudt19        | 8089    |
| chr16 | 5935830   | 5936772   | 1.5 | ATZ | Rbfox1           | Fam86         | 679781  | 1700123O21Rik | 38908   |
| chr8  | 69369695  | 69370290  | 1.5 | ATZ | NA               | Npy1r         | 138998  | Naf1          | 13826   |
| chr14 | 68399464  | 68401609  | 1.5 | ATZ | Dock5            | Gnrh1         | 31971   | Nefl          | 300332  |
| chr6  | 106724132 | 106724867 | 1.5 | ATZ | Trnt1            | Il5ra         | 25101   | Crbn          | 3372    |
| chr17 | 38061240  | 38061501  | 1.5 | ATZ | Olfr128          | Olfr127       | 19776   | Olfr761       | 27495   |
| chr16 | 85381208  | 85384669  | 1.5 | ATZ | NA               | App           | 207256  | Cyyr1         | 71821   |
| chr11 | 85007133  | 85009470  | 1.5 | ATZ | Appbp2           | 1700125H20Rik | 12477   | D630032N06Rik | 39198   |
| chr7  | 134601623 | 134602216 | 1.5 | ATZ | NA               | Zfp689        | 8951    | Prr14         | 12912   |
| chr4  | 154497273 | 154499951 | 1.5 | ATZ | Morn1            | Rer1          | 36867   | Ski           | 28233   |
| chr12 | 32516108  | 32517129  | 1.5 | ATZ | Cog5             | Gpr22         | 117317  | Hbp1          | 94191   |
| chr2  | 17480553  | 17481838  | 1.5 | ATZ | Nebi             | 4930515L03Rik | 545200  | H2afb1        | 436211  |
| chr18 | 8065854   | 8066373   | 1.5 | ATZ | NA               | Wac           | 136829  | Fzd8          | 1146481 |
| chr4  | 155357810 | 155358889 | 1.5 | ATZ | NA               | Fam132a       | 17072   | B3galt6       | 4686    |
| chr6  | 30463134  | 30465316  | 1.5 | ATZ | 1700025E21Rik    | Tmem209       | 3428    | Cpa2          | 26326   |
| chr14 | 67754173  | 67756356  | 1.5 | ATZ | NA               | Ppp2r2a       | 62865   | Ebf2          | 95773   |
| chr3  | 153662210 | 153664921 | 1.5 | ATZ | Slc44a5          | Acadm         | 54603   | Lhx8          | 304337  |
| chr13 | 46704017  | 46704754  | 1.5 | ATZ | Cap2             | Rbm24         | 177549  | C78339        | 60137   |
| chr18 | 31483746  | 31484530  | 1.5 | ATZ | NA               | Rit2          | 6964    | Syt4          | 112932  |
| chr8  | 106126477 | 106127420 | 1.5 | ATZ | NA               | Cdh11         | 817466  | 4933400L20Rik | 279     |
| chr8  | 74381173  | 74381501  | 1.5 | ATZ | NA               | Fcho1         | 131593  | Zfp709        | 24466   |
| chr4  | 129334160 | 129335268 | 1.5 | ATZ | Kpna6            | Txlna         | 15851   | Tmem39b       | 18331   |
| chr14 | 25184485  | 25184992  | 1.5 | ATZ | NA               | E330034G19Rik | 55304   | Polr3a        | 82924   |
| chr13 | 113925845 | 113927272 | 1.5 | ATZ | NA               | Gzma          | 34656   | Gzmk          | 34810   |
| chr2  | 57116472  | 57117169  | 1.5 | ATZ | Gpd2 Mir684-1    | 4930555B11Rik | 75804   | Galnt5        | 733397  |
| chr12 | 93515509  | 93517327  | 1.5 | ATZ | NA               | Sel1l         | 427912  | Flrt2         | 3413109 |
| chr13 | 43096173  | 43097453  | 1.5 | ATZ | Phactr1          | Edn1          | 692815  | Tbc1d7        | 149656  |
| chr14 | 8722714   | 8725405   | 1.5 | ATZ | Flnb             | Gm3558        | 321634  | Dnase1l3      | 72299   |
| chr6  | 76850004  | 76854371  | 1.5 | ATZ | Ctnna2           | 4931417E11Rik | 3430343 | Lrrtm1        | 338340  |
| chr8  | 80292881  | 80293418  | 1.5 | ATZ | NA               | Ednra         | 44530   | Ttc29         | 443823  |
| chr2  | 78106181  | 78107423  | 1.5 | ATZ | Gm14461 Mir684-1 | Cwc22         | 321771  | Ube2e3        | 601781  |
| chr17 | 29618846  | 29621276  | 1.5 | ATZ | NA               | Fgd2          | 102366  | Pim1          | 6714    |
| chr2  | 113547277 | 113549881 | 1.5 | ATZ | 4930533B01Rik    | Tmco5b        | 409930  | Grem1         | 38951   |
| chr15 | 20654789  | 20655616  | 1.5 | ATZ | NA               | Acot10        | 58284   | Cdh12         | 385591  |
| chr10 | 70329020  | 70330549  | 1.5 | ATZ | NA               | D630013N20Rik | 210309  | Bicc1         | 57299   |
| chr1  | 89300936  | 89304641  | 1.5 | ATZ | Gigyf2           | Kcnj13        | 9632    | 3110079O15Rik | 62198   |
| chr2  | 130927816 | 130931127 | 1.5 | ATZ | NA               | Siglec1       | 15315   | Hspa12b       | 22021   |
| chr12 | 106760848 | 106762225 | 1.5 | ATZ | NA               | D430019H16Rik | 29543   | Bdkrb2        | 39157   |
| chr3  | 154857634 | 154859958 | 1.5 | ATZ | NA               | Lrriq3        | 392     | 9330178D15Rik | 779360  |
| chr16 | 85379583  | 85381134  | 1.5 | ATZ | NA               | App           | 205631  | Cyyr1         | 75356   |
| chr3  | 84779320  | 84781469  | 1.5 | ATZ | Fbxw7            | Dear1         | 9818    | 1700036G14Rik | 339972  |
| chr1  | 102150647 | 102151865 | 1.5 | ATZ | Cntnap5b         | Slco6d1       | 1744690 | Gm20268       | 900480  |
| chr2  | 66008407  | 66009677  | 1.5 | ATZ | Mir684-1         | Galnt3        | 45557   | Ttc21b        | 12709   |
| chr17 | 53401273  | 53404024  | 1.5 | ATZ | NA               | Kcnh8         | 279943  | Efhh          | 134190  |

|       |           |           |     |      |                |               |         |               |         |
|-------|-----------|-----------|-----|------|----------------|---------------|---------|---------------|---------|
| chr17 | 7165663   | 7165883   | 1.5 | ATZ  | NA             | Tagap1        | 158     | Rnaset2b      | 17326   |
| chr2  | 68404302  | 68404660  | 1.5 | ATZ  | Mir684-1       | Stk39         | 94264   | 4933409G03Rik | 15810   |
| chr13 | 14410813  | 14411407  | 1.5 | ATZ  | Hecw1          | Arid4b        | 118943  | Mrpl32        | 291161  |
| chr1  | 100315716 | 100316649 | 1.5 | ATZ  | NA             | 1810006J02Rik | 274484  | Slco6d1       | 1052    |
| chr8  | 27193113  | 27195987  | 1.5 | ATZ  | Hook3          | Fnta          | 67040   | Rnf170        | 33865   |
| chr7  | 123138634 | 123140994 | 1.5 | ATZ  | Sox6           | A730082K24Rik | 1011153 | 1700003G18Rik | 84282   |
| chr4  | 25897828  | 25898830  | 1.5 | ATZ  | NA             | Fut9          | 170678  | Manea         | 352823  |
| chr1  | 26743638  | 26745273  | 1.5 | ATZ  | 4931408C20Rik  | Bai3          | 857086  | Gm597         | 2087694 |
| chr12 | 15732682  | 15733128  | 1.5 | ATZ  | NA             | 4930448C13Rik | 675487  | Trib2         | 65405   |
| chr2  | 131987236 | 131988410 | 1.5 | ATZ  | NA             | Slc23a2       | 16392   | Tmem230       | 76818   |
| chr5  | 109047928 | 109049391 | 1.5 | ATZ  | Gak            | Cplx1         | 68882   | Tmem175       | 9438    |
| chr17 | 22635875  | 22636124  | 1.5 | ATZ  | NA             | Zfp946        | 42219   | Vmn2r111      | 48784   |
| chr10 | 74740993  | 74741477  | 1.5 | ATZ  | Specc1l        | Bcr           | 93325   | Adora2a       | 38211   |
| chr1  | 72267282  | 72268971  | 1.5 | ATZ  | NA             | Mreg          | 8401    | Pecr          | 36776   |
| chr6  | 136578670 | 136579593 | 1.5 | ATZ  | Plbd1          | Atf7ip        | 22770   | Gucy2c        | 66212   |
| chr10 | 67781298  | 67784930  | 1.5 | ATZ  | 4930545H06Rik  | Arid5b        | 39824   | 1700040L02Rik | 108774  |
| chr13 | 112274352 | 112277228 | 1.5 | ATZ  | Gbp1           | Actbl2        | 226395  | Mier3         | 199158  |
| chr6  | 8470054   | 8471999   | 1.5 | ATZ  | Glcc1          | A430035B10Rik | 10893   | Ica1          | 108528  |
| chr14 | 76974728  | 76975162  | 1.5 | ATZ  | NA             | Serp2         | 18032   | 1700108F19Rik | 102213  |
| chr1  | 21894797  | 21895501  | 1.5 | ATZ  | Kcnq5          | Khdc1b        | 518332  | Rims1         | 383002  |
| chr15 | 13521348  | 13524140  | 1.5 | ATZ  | NA             | Cdh6          | 417954  | Cdh9          | 3183716 |
| chr9  | 18580228  | 18580918  | 1.5 | ATZ  | NA             | Olfr24        | 20151   | Olfr828       | 38880   |
| chr13 | 46835783  | 46837319  | 1.5 | ATZ  | NA             | Nup153        | 12565   | Kif13a        | 7138    |
| chr2  | 180469146 | 180470126 | 1.5 | ATZ  | Slc17a9        | Gid8          | 15924   | Bhlhe23       | 38960   |
| chr11 | 18732535  | 18734592  | 1.5 | ATZ  | NA             | Etaa1         | 878657  | Meis1         | 45839   |
| chr11 | 37558643  | 37561887  | 1.5 | ATZ  | NA             | Tenm2         | 800898  | Gm12130       | 743163  |
| chr3  | 38907597  | 38910533  | 1.5 | ATZ  | Fat4           | Ankrd50       | 523859  | 1700017G19Rik | 1493254 |
| chr4  | 114236968 | 114237616 | 1.5 | ATZ  | Trab2b         | Skint11       | 319335  | Gm12830       | 256709  |
| chr4  | 34702464  | 34705282  | 1.5 | ATZ  | Gm136          | 1700003M02Rik | 25009   | Smim8         | 10639   |
| chr6  | 24323214  | 24324245  | 1.5 | ATZ  | NA             | Slc13a1       | 205122  | Iqub          | 70620   |
| chr2  | 164541288 | 164541817 | 1.5 | cont | Spint5         | Spint4        | 13340   | Wfdc3         | 14909   |
| chr2  | 151257312 | 151257829 | 1.5 | ATZ  | NA             | 4930442J19Rik | 115573  | 4921509C19Rik | 38449   |
| chr5  | 120256540 | 120259103 | 1.5 | ATZ  | NA             | Gm16065       | 115313  | Tbx5          | 25569   |
| chr18 | 80825641  | 80827436  | 1.5 | ATZ  | Nfatc1         | Gm2176        | 84356   | Atp9b         | 103444  |
| chr13 | 21827166  | 21827656  | 1.5 | cont | Hist1h4j       | Hist1h2bm     | 12819   | Hist1h4k      | 14407   |
| chr4  | 135545636 | 135547261 | 1.5 | ATZ  | NA             | Pithd1        | 2477    | Tceb3         | 12024   |
| chr15 | 81235364  | 81239268  | 1.5 | ATZ  | Dnajb7 Xpnpep3 | St13          | 5240    | Rbx1          | 57478   |
| chr11 | 114285677 | 114289258 | 1.5 | ATZ  | 4932435O22Rik  | 1700092K14Rik | 225164  | Rpl38         | 240599  |
| chr9  | 54113404  | 54116365  | 1.5 | ATZ  | NA             | Cyp19a1       | 72155   | 1700104A03Rik | 22      |
| chr3  | 105816172 | 105818608 | 1.5 | ATZ  | Pifo           | Ovgp1         | 25831   | Chia          | 97692   |
| chr3  | 108546456 | 108547816 | 1.5 | ATZ  | Aknad1         | Gpsm2         | 21239   | Stxbp3a       | 48282   |
| chr2  | 65874093  | 65877791  | 1.5 | ATZ  | Mir684-1       | Csrnp3        | 4490    | Galnt3        | 43032   |
| chr2  | 56362235  | 56363002  | 1.5 | ATZ  | Mir684-1       | Kcnj3         | 914299  | Nr4a2         | 596635  |
| chr1  | 10045163  | 10049274  | 1.5 | ATZ  | Cspp1          | Cops5         | 17184   | Arfgef1       | 78314   |
| chr2  | 105316048 | 105317564 | 1.5 | ATZ  | NA             | Rcn1          | 76572   | Pax6os1       | 58673   |
| chr5  | 6412462   | 6414852   | 1.5 | ATZ  | NA             | Steap1        | 663145  | Zfp804b       | 354178  |
| chr15 | 46154816  | 46157698  | 1.5 | ATZ  | 1700022A22Rik  | Kcnv1         | 1208336 | 4930523O13Rik | 109714  |
| chr18 | 70266548  | 70267698  | 1.5 | ATZ  | Rab27b         | Ccdc68        | 137410  | Dynap         | 132385  |
| chr6  | 29229398  | 29232014  | 1.5 | ATZ  | Fam71f2        | Hilpda        | 3949    | Fam71f1       | 37126   |
| chr4  | 134467453 | 134468059 | 1.5 | ATZ  | Tmem50a        | Rhd           | 15366   | D4Wsu53e      | 11481   |
| chr4  | 35850671  | 35851768  | 1.5 | ATZ  | Lingo2         | 3110043O21Rik | 677542  | Mir876        | 740638  |
| chr14 | 97785706  | 97786879  | 1.5 | ATZ  | NA             | Klhl1         | 867453  | Dach1         | 399187  |

|       |           |           |     |     |               |               |         |               |         |
|-------|-----------|-----------|-----|-----|---------------|---------------|---------|---------------|---------|
| chr3  | 120984323 | 120987281 | 1.5 | ATZ | NA            | Tmem56        | 18089   | Alg14         | 7454    |
| chr5  | 115762182 | 115764218 | 1.5 | ATZ | NA            | Dynll1        | 11183   | Srsf9         | 12968   |
| chr5  | 120408002 | 120411227 | 1.5 | ATZ | NA            | Tbx5          | 72775   | Rbm19         | 155295  |
| chr6  | 100711658 | 100712565 | 1.5 | ATZ | Gxylt2        | Shq1          | 90507   | Ppp4r2        | 71067   |
| chr12 | 92206866  | 92209910  | 1.5 | ATZ | NA            | Dio2          | 229988  | Cep128        | 27022   |
| chr16 | 78223331  | 78225037  | 1.5 | ATZ | NA            | Mir125b-2     | 576743  | E330011O21Rik | 26071   |
| chr1  | 78736788  | 78737776  | 1.5 | ATZ | NA            | Acsl3         | 32470   | Kcne4         | 75748   |
| chr15 | 77258312  | 77258667  | 1.5 | ATZ | Apol7b        | Apol9a        | 16802   | Apol10a       | 48810   |
| chrX  | 166216007 | 166217706 | 1.5 | ATZ | 4933400A11Rik | Hccs          | 457732  | G530011O06Rik | 195269  |
| chr14 | 27512438  | 27513933  | 1.5 | ATZ | NA            | Pde12         | 23106   | Asb14         | 193857  |
| chr7  | 145745184 | 145748582 | 1.5 | ATZ | NA            | Tcerg1l       | 155771  | Mapk1ip1      | 278919  |
| chr12 | 84039774  | 84041685  | 1.5 | ATZ | 1700085C21Rik | Sipa1l1       | 487003  | Dpf3          | 273053  |
| chr2  | 160683158 | 160684959 | 1.5 | ATZ | Zhx3          | Plcg1         | 81662   | Lpin3         | 21447   |
| chr5  | 135085197 | 135086545 | 1.5 | ATZ | Lat2          | Rfc2          | 10999   | Eif4h         | 9201    |
| chr6  | 17680702  | 17682125  | 1.5 | ATZ | NA            | Capza2        | 64166   | St7           | 17091   |
| chr9  | 15168131  | 15170997  | 1.5 | ATZ | NA            | 5830418K08Rik | 5899    | BC017612      | 138942  |
| chr1  | 53028782  | 53030459  | 1.5 | ATZ | NA            | 1700019D03Rik | 19098   | Mstn          | 88048   |
| chr12 | 100344742 | 100345934 | 1.5 | ATZ | NA            | Ttc8          | 123294  | 4930474N09Rik | 53553   |
| chr6  | 76698124  | 76699913  | 1.5 | ATZ | NA            | 4931417E11Rik | 3278463 | Ctnna2        | 131718  |
| chr15 | 47152348  | 47154164  | 1.5 | ATZ | NA            | 4930548G14Rik | 680944  | Csmd3         | 258020  |
| chr9  | 104058978 | 104060633 | 1.5 | ATZ | Dnajc13       | Acad11        | 29002   | Acpp          | 129937  |
| chr1  | 103098235 | 103098939 | 1.5 | ATZ | NA            | Gm20268       | 26456   | Cdh20         | 3566457 |
| chr10 | 51508798  | 51510190  | 1.5 | ATZ | NA            | 4933411G06Rik | 31798   | Vgll2         | 232302  |
| chr13 | 65133951  | 65136740  | 1.5 | ATZ | Spata31d1c    | Spata31       | 109448  | Hiatl1        | 29598   |
| chr11 | 43709544  | 43711144  | 1.5 | ATZ | NA            | Adra1b        | 59710   | Il12b         | 502421  |
| chr2  | 91169357  | 91170906  | 1.5 | ATZ | 1110051M20Rik | Arfgap2       | 51829   | Lrp4          | 126782  |
| chr16 | 38143268  | 38145388  | 1.5 | ATZ | Gsk3b         | BC031361      | 53922   | Nr1i2         | 103047  |
| chr5  | 118859163 | 118860589 | 1.5 | ATZ | NA            | 2410131K14Rik | 146040  | Med13l        | 150139  |
| chr2  | 169213184 | 169216002 | 1.5 | ATZ | NA            | 1700017J07Rik | 408778  | Tshz2         | 243144  |
| chr1  | 179719227 | 179721422 | 1.5 | ATZ | Adss          | 1700016C15Rik | 35791   | Gm16432       | 200144  |
| chr14 | 44325776  | 44326406  | 1.5 | ATZ | NA            | Gm10375       | 140098  | Ear1          | 70025   |
| chr15 | 33478522  | 33481973  | 1.5 | ATZ | Cpq           | 1700084J12Rik | 142828  | 4930592A05Rik | 41663   |
| chr16 | 77351769  | 77352351  | 1.5 | ATZ | 2810055G20Rik | Usp25         | 234744  | Mir99a        | 246830  |
| chr6  | 83769113  | 83771153  | 1.5 | ATZ | Paip2b        | Nagk          | 16563   | Zfml          | 93194   |
| chr16 | 73073139  | 73074918  | 1.5 | ATZ | NA            | Robo1         | 26794   | Robo2         | 817633  |
| chr18 | 54414837  | 54416982  | 1.5 | ATZ | NA            | Csnk1g3       | 299499  | 9430076G02Rik | 164967  |
| chr3  | 79434015  | 79434823  | 1.5 | ATZ | 4930579G24Rik | Etfdh         | 1326    | Rxfp1         | 13815   |
| chr16 | 76121327  | 76124571  | 1.5 | ATZ | 4930578N18Rik | Samsn1        | 211816  | Nrip1         | 166536  |
| chr14 | 120073185 | 120075326 | 1.5 | ATZ | Hs6st3        | Uggt2         | 574529  | 1700006F04Rik | 73123   |
| chr7  | 39236281  | 39237164  | 1.5 | ATZ | NA            | Pop4          | 179914  | Gm5591        | 65994   |
| chr7  | 102701387 | 102703215 | 1.5 | ATZ | NA            | Fam181b       | 2471156 | Tenm4         | 655932  |
| chr1  | 83269421  | 83271713  | 1.5 | ATZ | Sphkap        | Wdr69         | 62274   | Pid1          | 761155  |
| chr1  | 188748980 | 188752013 | 1.5 | ATZ | NA            | Rrp15         | 175743  | D1Pas1        | 39282   |
| chr11 | 97399858  | 97402736  | 1.5 | ATZ | Srcin1        | Arhgap23      | 36144   | 2410003L11Rik | 57089   |
| chr14 | 20236574  | 20237182  | 1.5 | ATZ | NA            | Ube2e2        | 510433  | Gm5458        | 176178  |
| chr1  | 46723370  | 46723870  | 1.5 | ATZ | NA            | Dnahc7b       | 292975  | Slc39a10      | 140519  |
| chr4  | 62254381  | 62257090  | 1.5 | ATZ | Rgs3          | 4933430I17Rik | 45354   | Zfp618        | 369518  |
| chr18 | 64435266  | 64437459  | 1.5 | ATZ | 1700091E21Rik | Wdr7          | 285853  | Onecut2       | 62559   |
| chr15 | 36210487  | 36211270  | 1.5 | ATZ | Rnf19a        | Spag1         | 45555   | Ankrd46       | 196153  |
| chr1  | 96073418  | 96074300  | 1.5 | ATZ | NA            | Pdcd1         | 124288  | 4930440C22Rik | 619719  |
| chr1  | 72688411  | 72689129  | 1.5 | ATZ | NA            | Smarcal1      | 5047    | Ankar         | 425     |
| chr13 | 43516964  | 43518660  | 1.5 | ATZ | Ranbp9        | Nol7          | 18737   | Ccdc90a       | 115115  |

|       |           |           |     |     |                     |               |         |                 |         |
|-------|-----------|-----------|-----|-----|---------------------|---------------|---------|-----------------|---------|
| chr5  | 60793819  | 60795369  | 1.5 | ATZ | NA                  | 4933402J10Rik | 416578  | G6pd2           | 1404713 |
| chr17 | 7830162   | 7830648   | 1.5 | ATZ | Gm1604b<br>Rnaset2b | Gm9992        | 240508  | Fndc1           | 100785  |
| chr11 | 53167212  | 53167639  | 1.5 | ATZ | Aff4                | Zcchc10       | 20409   | Leap2           | 68044   |
| chr3  | 88270656  | 88271562  | 1.5 | ATZ | NA                  | Sema4a        | 5552    | Lmna            | 13509   |
| chr11 | 14076142  | 14079835  | 1.5 | ATZ | NA                  | Cobl          | 1711179 | 1700046C09Rik   | 380504  |
| chr12 | 71969215  | 71970467  | 1.5 | ATZ | Frmd6               | Tmx1          | 400604  | Actr10          | 68377   |
| chr1  | 121794857 | 121796989 | 1.5 | ATZ | NA                  | Ptpn4         | 61209   | Tmem177         | 7489    |
| chr15 | 79152586  | 79153554  | 1.5 | ATZ | Pla2g6              | Baiap2l2      | 36647   | Maff            | 24554   |
| chr8  | 121428540 | 121430759 | 1.5 | ATZ | Cdh13               | Mphosph6      | 1102711 | Hsbp1           | 437679  |
| chr1  | 32603342  | 32603906  | 1.5 | ATZ | Gm5415 Khdrbs       | Gm9839        | 25498   | Prim2           | 906750  |
| chr18 | 74845541  | 74846827  | 1.5 | ATZ | Myo5b               | 1700120E14Rik | 154763  | Scarna17        | 91221   |
| chr1  | 107049585 | 107050999 | 1.5 | ATZ | NA                  | Cdh20         | 157527  | Rnf152          | 122495  |
| chr1  | 39906633  | 39910311  | 1.5 | ATZ | NA                  | 1700066B17Rik | 2458    | Map4k4          | 47447   |
| chr16 | 90078445  | 90080971  | 1.5 | ATZ | NA                  | Tiam1         | 103501  | Gm10789         | 61511   |
| chr3  | 8746016   | 8747542   | 1.5 | ATZ | NA                  | Hey1          | 78978   | Mrps28          | 54604   |
| chr1  | 163088279 | 163091187 | 1.5 | ATZ | 4930469G21Rik       | Klhl20        | 26669   | Prdx6           | 79056   |
| chr17 | 77713382  | 77713839  | 1.5 | ATZ | NA                  | Gm4710        | 1425003 | Crim1           | 885749  |
| chr17 | 54506433  | 54507634  | 1.5 | ATZ | 1700025K24Rik       | Slc5a7        | 68074   | Stgal2          | 1077381 |
| chr7  | 6339562   | 6340122   | 1.5 | ATZ | Zfp28               | Zfp78         | 4247    | Gm16532         | 27764   |
| chr3  | 84764802  | 84765719  | 1.5 | ATZ | Fbxw7               | Tmem154       | 256305  | Dear1           | 3259    |
| chr2  | 91167204  | 91169196  | 1.5 | ATZ | 1110051M20Rik       | Arfgap2       | 49676   | Lrp4            | 128492  |
| chr8  | 104222329 | 104223498 | 1.5 | ATZ | NA                  | Cdh8          | 2281972 | Cdh11           | 933397  |
| chr14 | 119133727 | 119134083 | 1.5 | ATZ | NA                  | Abcc4         | 28286   | Cldn10          | 53010   |
| chr5  | 147611949 | 147614607 | 1.5 | ATZ | NA                  | Usp12         | 5417    | Rpl21           | 29859   |
| chr14 | 124386474 | 124387683 | 1.5 | ATZ | 1700024B18Rik       | Itgbl1        | 13173   | NA              | NA      |
| chr8  | 109981247 | 109983205 | 1.5 | ATZ | Wwp2                | Nob1          | 32309   | Mir140          | 91939   |
| chr15 | 13083611  | 13086538  | 1.5 | ATZ | Cdh6                | Drosha        | 218565  | Cdh9            | 3621318 |
| chr17 | 38039794  | 38040356  | 1.5 | ATZ | NA                  | Olfr126       | 51296   | Olfr127         | 137     |
| chr6  | 60671499  | 60672765  | 1.5 | ATZ | NA                  | A530053G22Rik | 317798  | Snca            | 8802    |
| chr8  | 107949864 | 107954258 | 1.5 | ATZ | Lrrc36              | Kctd19        | 12477   | Tppp3           | 37134   |
| chr4  | 10724045  | 10725306  | 1.5 | ATZ | 1700123O12Rik       | 4930448K20Rik | 879501  | 2610301B20Rik   | 76339   |
| chrX  | 133510187 | 133510761 | 1.5 | ATZ | Tmsb15b1 Tmsl       | Tmsb15b2      | 17669   | Slc25a53        | 4894    |
| chr7  | 31946862  | 31947971  | 1.5 | ATZ | Gm10640             | Gramd1a       | 10793   | Scgb1b2         | 127567  |
| chr3  | 91944426  | 91947263  | 1.5 | ATZ | Lelp1               | Prr9          | 16557   | Sprr2a1 Sprr2a2 | 72494   |
| chr14 | 123112957 | 123114393 | 1.5 | ATZ | Pcca                | Zic2          | 233407  | Ggact           | 175689  |
| chr7  | 26344210  | 26345678  | 1.5 | ATZ | 4732471J01Rik       | Ceacam2       | 19187   | Gm7092          | 53962   |
| chr6  | 24682670  | 24685027  | 1.5 | ATZ | Hyal6               | Wasl          | 67675   | Hyal4           | 13340   |
| chr1  | 57444308  | 57445162  | 1.5 | ATZ | Tyw5                | 1700066M21Rik | 2042    | 9430016H08Rik   | 18230   |
| chr13 | 86282937  | 86283492  | 1.5 | ATZ | NA                  | Cox7c         | 96537   | Edil3           | 2677585 |
| chr7  | 48923080  | 48925378  | 1.5 | ATZ | Vmn2r-ps54          | Zfp788        | 16178   | Vmn2r58         | 166873  |
| chr1  | 166121859 | 166124896 | 1.5 | ATZ | F5                  | Gm16548       | 39511   | Slc19a2         | 54281   |
| chr14 | 76836063  | 76838028  | 1.5 | ATZ | Tsc22d1             | Nufip1        | 298877  | 4930444M15Rik   | 76337   |
| chr9  | 118295966 | 118296323 | 1.5 | ATZ | NA                  | Cmc1          | 236652  | 4933432G23Rik   | 42634   |
| chr15 | 27785275  | 27787545  | 1.5 | ATZ | Trio                | Fam105a       | 173978  | Dnahc5          | 345976  |
| chr2  | 113186581 | 113188402 | 1.5 | ATZ | Fmn1                | Tmco5b        | 49234   | 4930533B01Rik   | 342808  |
| chr12 | 88070977  | 88071638  | 1.5 | ATZ | NA                  | Angel1        | 3567    | Gm6772          | 3681    |
| chr17 | 29621499  | 29625073  | 1.5 | ATZ | NA                  | Fgd2          | 105019  | Pim1            | 2917    |
| chr8  | 37237878  | 37239551  | 1.5 | ATZ | NA                  | D8Ertd82e     | 27037   | Lonrf1          | 39567   |
| chr2  | 148644721 | 148647637 | 1.5 | ATZ | Cst13               | Cst8          | 13401   | Cst9            | 13246   |
| chr1  | 142551975 | 142553020 | 1.5 | ATZ | 4930590L20Rik       | Kcnt2         | 45137   | Cdc73           | 2901609 |
| chr14 | 52925226  | 52925605  | 1.5 | ATZ | NA                  | Mettl3        | 427     | Sall2           | 5247    |

|       |           |           |     |     |               |               |         |               |        |
|-------|-----------|-----------|-----|-----|---------------|---------------|---------|---------------|--------|
| chr5  | 88410379  | 88410605  | 1.5 | ATZ | Cabs1         | 1700066N21Rik | 2003    | Smr3a         | 20945  |
| chr16 | 17346471  | 17347225  | 1.5 | ATZ | Pi4ka         | Serpind1      | 2806    | Snap29        | 58868  |
| chr2  | 17891682  | 17892155  | 1.5 | ATZ | NA            | Nebi          | 238987  | H2afb1        | 25894  |
| chr4  | 125513890 | 125515501 | 1.5 | ATZ | NA            | Grik3         | 122473  | 2610028E06Rik | 49594  |
| chr3  | 151838439 | 151839913 | 1.5 | ATZ | NA            | Gipc2         | 9575    | Dnajib4       | 7006   |
| chr17 | 71663816  | 71665047  | 1.5 | ATZ | NA            | Emilin2       | 3511    | Gm4566        | 17494  |
| chr3  | 6619475   | 6621077   | 1.5 | ATZ | 1700008P02Rik | Pex2          | 1043227 | Pkia          | 745527 |
| chr1  | 50162420  | 50163313  | 1.5 | ATZ | NA            | Slc39a10      | 3252066 | Tmeff2        | 821054 |
| chr10 | 63282280  | 63284908  | 1.5 | ATZ | Ctnna3        | Dnajc12       | 410692  | Lrrtm3        | 106337 |
| chr4  | 19931320  | 19933069  | 1.5 | ATZ | 4930480G23Rik | Atp6v0d2      | 81607   | Ttpa          | 2506   |
| chr5  | 22819825  | 22821040  | 1.5 | ATZ | NA            | Lhfp13        | 38410   | 5031425E22Rik | 116586 |
| chr8  | 74968274  | 74970035  | 1.5 | ATZ | 1700030K09Rik | Calr3         | 597     | Cherp         | 14347  |
| chr17 | 7830926   | 7832450   | 1.5 | ATZ | Gm1604b Rnase | Gm9992        | 241272  | Fndc1         | 98983  |
| chr14 | 48955198  | 48957426  | 1.5 | ATZ | NA            | Peli2         | 74640   | 6720456H20Rik | 108601 |
| chr3  | 34638608  | 34639558  | 1.5 | ATZ | NA            | Gm3143        | 23024   | Gm6639        | 856516 |
| chr12 | 88112547  | 88113375  | 1.5 | ATZ | NA            | Gm6772        | 7802    | Irf2bpl       | 108278 |
| chr10 | 62709337  | 62710692  | 1.5 | ATZ | Herc4         | Mypn          | 42637   | Sirt1         | 71061  |
| chr4  | 103331071 | 103333167 | 1.5 | ATZ | NA            | Gm12718       | 166278  | Dab1          | 706998 |

Supplemental file 2. Differential H3K4me3 peaks associated with DSBs

| Chromosome | Start     | End       | Fold_Change | H3K4me3_Accumulated | H3K4me3_Within_genes | H3K4me3_nearest_upstream_gene | Distance_to_nearest_upstream_gene | H3K4me3_nearest_downstream_gene | Distance_to_nearest_downstream_gene |
|------------|-----------|-----------|-------------|---------------------|----------------------|-------------------------------|-----------------------------------|---------------------------------|-------------------------------------|
| chr13      | 120278317 | 120279418 | 4.1         | ATZ                 | Gm7120               | 3110070M22Rik                 | 1126                              | NA                              | NA                                  |
| chr8       | 74543719  | 74544319  | 2.2         | ATZ                 | NA                   | Cyp4f18                       | 10194                             | Olf372                          | 37240                               |
| chr10      | 92038881  | 92039318  | 2.1         | ATZ                 | NA                   | Gm20757                       | 200763                            | Nedd1                           | 108172                              |
| chr12      | 46228758  | 46229166  | 2.0         | ATZ                 | NA                   | Stxbp6                        | 53288                             | Nova1                           | 1566338                             |
| chr14      | 123339870 | 123340244 | 2.0         | ATZ                 | Tmtc4                | Ggact                         | 27483                             | AA536875                        | 227481                              |
| chr12      | 47689674  | 47689940  | 1.9         | ATZ                 | NA                   | Stxbp6                        | 1514204                           | Nova1                           | 105564                              |
| chr1       | 30910083  | 30910617  | 1.9         | ATZ                 | Phf3                 | Gm597                         | 2072986                           | Ptp4a1                          | 86531                               |
| chr1       | 174105806 | 174106269 | 1.8         | ATZ                 | Dcaf8                | Pex19                         | 39178                             | Pea15a                          | 20591                               |
| chr14      | 37739850  | 37740196  | 1.8         | ATZ                 | Ccser2               | 4930474N05Rik                 | 829809                            | Rgr                             | 110480                              |
| chr7       | 53090957  | 53091451  | 1.8         | ATZ                 | Grin2d               | Grwd1                         | 4798                              | Kdelr1                          | 36759                               |
| chr3       | 61022256  | 61022818  | 1.8         | ATZ                 | NA                   | P2ry1                         | 209355                            | Rap2b                           | 145611                              |
| chr14      | 55298531  | 55299105  | 1.8         | ATZ                 | Acin1                | 4930579G18Rik                 | 24594                             | 1700123O20Rik                   | 5903                                |
| chr1       | 68983601  | 68983891  | 1.7         | ATZ                 | ErbB4                | Cps1                          | 1706579                           | Ikzf2                           | 593893                              |
| chr14      | 69947094  | 69948831  | 1.7         | Cont                | Gm16677              | Synb                          | 34738                             | Entpd4                          | 6377                                |
| chr1       | 165736065 | 165736909 | 1.7         | ATZ                 | Kifap3               | Mettl11b                      | 80702                             | Scyl3                           | 123286                              |
| chr14      | 119711630 | 119713140 | 1.7         | ATZ                 | Hs6st3               | Uggt2                         | 212974                            | 1700006F04Rik                   | 435309                              |
| chr7       | 121631675 | 121632201 | 1.7         | ATZ                 | Pde3b                | 4933406I18Rik                 | 73000                             | Cyp2r1                          | 61481                               |
| chr16      | 96682408  | 96683439  | 1.7         | ATZ                 | NA                   | Itgb2l                        | 17187                             | Pcp4                            | 5774                                |
| chr2       | 35040527  | 35041713  | 1.7         | ATZ                 | Rab14                | Cep110                        | 6185                              | Gsn                             | 70166                               |
| chr4       | 94976976  | 94977630  | 1.7         | ATZ                 | NA                   | Jun                           | 258063                            | Fggy                            | 246568                              |
| chr1       | 58613144  | 58613581  | 1.7         | ATZ                 | Fam126b              | Orc2                          | 51191                             | Ndufb3                          | 29862                               |
| chr1       | 130430361 | 130430647 | 1.7         | ATZ                 | NA                   | Dars                          | 116368                            | Cxcr4                           | 54129                               |
| chr11      | 117519434 | 117520027 | 1.7         | ATZ                 | Tnrc6c               | 2900041M22Rik                 | 44703                             | Tmc6                            | 107272                              |
| chr14      | 87560483  | 87560755  | 1.6         | ATZ                 | NA                   | Diap3                         | 19562                             | Tdrd3                           | 255635                              |
| chr13      | 3598530   | 3600130   | 1.6         | ATZ                 | BC016423             | Gdi2                          | 33023                             | Asb13                           | 33148                               |
| chr6       | 58798485  | 58799408  | 1.6         | ATZ                 | Herc3                | Abcg2                         | 156040                            | Nap1l5                          | 55819                               |
| chr18      | 49526007  | 49526544  | 1.6         | ATZ                 | NA                   | G630055G22Rik                 | 1258373                           | 1700044K03Rik                   | 156399                              |
| chr4       | 96197763  | 96198380  | 1.6         | ATZ                 | Cyp2j6               | Cyp2j8                        | 23686                             | Cyp2j9                          | 36740                               |
| chr19      | 60615205  | 60616654  | 1.6         | ATZ                 | Cacul1               | Prhr                          | 70998                             | Nanos1                          | 215236                              |
| chr19      | 24457474  | 24458303  | 1.6         | ATZ                 | Pip5k1b              | Fxn                           | 102398                            | Fam122a                         | 91966                               |
| chr19      | 43218118  | 43218916  | 1.6         | ATZ                 | Hps2                 | Hps1                          | 363652                            | Cnnm1                           | 296010                              |
| chr1       | 157540616 | 157541159 | 1.6         | ATZ                 | NA                   | Acbd6                         | 6253                              | Lhx4                            | 7665                                |
| chr13      | 32360875  | 32361606  | 1.6         | ATZ                 | Gm6s                 | Foxc1                         | 458371                            | Mylk4                           | 431090                              |
| chr3       | 88353557  | 88354454  | 1.6         | ATZ                 | Lamtor2              | Rab25                         | 1356                              | Ubqln4                          | 3184                                |
| chr7       | 104792205 | 104794646 | 1.6         | ATZ                 | Rsf1                 | Aamdc                         | 64198                             | Clns1a                          | 50521                               |
| chr4       | 48463079  | 48463756  | 1.6         | ATZ                 | Tex10                | Invs                          | 18254                             | Msantd3                         | 89062                               |
| chr3       | 36909884  | 36911272  | 1.6         | ATZ                 | 4932438A13Rik        | Trpc3                         | 320795                            | Adad1                           | 51306                               |
| chr10      | 51679917  | 51681035  | 1.6         | ATZ                 | NA                   | 4933411G06Rik                 | 202917                            | Vgll2                           | 61457                               |
| chr15      | 85204494  | 85205197  | 1.6         | ATZ                 | Atxn10               | Fbln1                         | 87770                             | 7530416G11Rik                   | 117969                              |
| chr17      | 91164415  | 91164943  | 1.6         | ATZ                 | Nrxn1                | Gm4719                        | 1380082                           | 4930480K15Rik                   | 95566                               |
| chr6       | 122368081 | 122368616 | 1.6         | ATZ                 | NA                   | Phc1                          | 77836                             | Rimklb                          | 35011                               |
| chr14      | 106883569 | 106887643 | 1.6         | ATZ                 | 1700128A07Rik        | Trim52                        | 348490                            | Slitrk1                         | 2421563                             |
| chr7       | 125360206 | 125361504 | 1.6         | ATZ                 | Smg1                 | Arl6ip1                       | 87067                             | 4930583K01Rik                   | 25917                               |

|       |           |           |     |      |                     |               |         |               |         |
|-------|-----------|-----------|-----|------|---------------------|---------------|---------|---------------|---------|
| chr2  | 17015210  | 17017125  | 1.6 | ATZ  | NA                  | 4930515L03Rik | 79857   | Nebi          | 251236  |
| chr3  | 119346166 | 119347447 | 1.6 | ATZ  | NA                  | Dpyd          | 210330  | Ptbp2         | 74213   |
| chr5  | 128202311 | 128202802 | 1.6 | ATZ  | NA                  | Glt1d1        | 14421   | Tmem132d      | 61059   |
| chr2  | 37992137  | 37994382  | 1.6 | ATZ  | Dennd1a<br>Mir684-1 | Crb2          | 337514  | Lhx2          | 212446  |
| chr4  | 106906182 | 106906704 | 1.6 | ATZ  | Lrrc42              | Ldlrad1       | 15663   | Hspb11        | 19835   |
| chr5  | 115516929 | 115517695 | 1.6 | ATZ  | Sppl3               | Hnf1a         | 95858   | Gm13826       | 35236   |
| chr1  | 4598241   | 4599621   | 1.6 | ATZ  | NA                  | Sox17         | 111747  | Mrpl15        | 163658  |
| chr11 | 11387352  | 11388461  | 1.6 | ATZ  | NA                  | Zpbp          | 24930   | 4930415F15Rik | 808     |
| chr11 | 31404267  | 31404772  | 1.6 | ATZ  | NA                  | Stc2          | 134206  | Bod1          | 160378  |
| chr12 | 65955679  | 65956531  | 1.6 | ATZ  | NA                  | Fscb          | 379794  | Gm527         | 62367   |
| chr14 | 37715518  | 37715988  | 1.6 | ATZ  | Ccser2              | 4930474N05Rik | 805477  | Rgr           | 134688  |
| chr9  | 96983753  | 96984106  | 1.6 | ATZ  | Slc25a36            | Spsb4         | 64979   | Trim42        | 265875  |
| chr13 | 81118403  | 81120800  | 1.6 | ATZ  | 9330111N05<br>Rik   | Arrdc3        | 83100   | Gpr98         | 113267  |
| chr10 | 75310686  | 75311903  | 1.6 | ATZ  | NA                  | Gstt2         | 13060   | Mif           | 10195   |
| chr1  | 46971615  | 46972035  | 1.6 | ATZ  | NA                  | Slc39a10      | 61261   | Tmeff2        | 4012332 |
| chr2  | 113956184 | 113956781 | 1.6 | ATZ  | Aqr                 | C130080G10Rik | 68946   | Zfp770        | 62416   |
| chr1  | 101756912 | 101757942 | 1.5 | ATZ  | Cntnap5b            | Slco6d1       | 1350955 | Gm20268       | 1294403 |
| chr2  | 139514137 | 139514801 | 1.5 | ATZ  | lsm1                | Sptlc3        | 50727   | Tasp1         | 144415  |
| chr1  | 68007813  | 68008575  | 1.5 | ATZ  | NA                  | Cps1          | 730791  | Erbp4         | 77965   |
| chr2  | 126752438 | 126754410 | 1.5 | ATZ  | Sppl2a              | Trpm7         | 50441   | Ap4e1         | 80037   |
| chr2  | 168258992 | 168260119 | 1.5 | ATZ  | NA                  | Kcng1         | 164161  | Nfatc2        | 41791   |
| chr6  | 37729328  | 37730661  | 1.5 | ATZ  | NA                  | Akr1d1        | 210513  | Trim24        | 90150   |
| chr6  | 110210664 | 110212053 | 1.5 | ATZ  | NA                  | Edem1         | 1401314 | Grm7          | 383539  |
| chr2  | 102574656 | 102575731 | 1.5 | ATZ  | Slc1a2              | Pamr1         | 91459   | Cd44          | 75569   |
| chr16 | 31410287  | 31411120  | 1.5 | ATZ  | NA                  | Apod          | 95605   | Bdh1          | 11263   |
| chr6  | 7512317   | 7513712   | 1.5 | ATZ  | Tac1                | Acn9          | 523097  | Asns          | 111459  |
| chr10 | 38839161  | 38842529  | 1.5 | ATZ  | Fam229b             | Lama4         | 9167    | Tube1         | 11300   |
| chr1  | 89335132  | 89335915  | 1.5 | ATZ  | Gigyf2              | Kcnj13        | 43828   | 3110079O15Rik | 30924   |
| chr4  | 53538058  | 53538582  | 1.5 | ATZ  | Slc44a1             | Al427809      | 254954  | Fsd1l         | 105761  |
| chr6  | 17682592  | 17683371  | 1.5 | ATZ  | NA                  | Capza2        | 66056   | St7           | 15845   |
| chr9  | 41219401  | 41220623  | 1.5 | ATZ  | 3110039I08Ri<br>k   | 1700063D05Rik | 193691  | Mir100        | 118885  |
| chr17 | 66182699  | 66183548  | 1.5 | ATZ  | Ppp4r1              | Rab31         | 60607   | Ralbp1        | 14221   |
| chr2  | 143637641 | 143638377 | 1.5 | ATZ  | Pcsk2               | Gm12360       | 22719   | Bfsp1         | 13887   |
| chr9  | 43996174  | 43997501  | 1.5 | ATZ  | Cbl                 | Mcam          | 45365   | Ccdc153       | 51259   |
| chr5  | 38734483  | 38736468  | 1.5 | ATZ  | 4930487D11R<br>ik   | Drd5          | 20934   | Slc2a9        | 4044    |
| chr15 | 65130901  | 65132233  | 1.5 | ATZ  | NA                  | Adcy8         | 377043  | Efr3a         | 486370  |
| chr1  | 37210611  | 37213217  | 1.5 | ATZ  | NA                  | Tmem131       | 214239  | Cnga3         | 62889   |
| chr1  | 140863788 | 140864774 | 1.5 | ATZ  | Dennd1b             | 2310009B15Rik | 110357  | Crb1          | 230057  |
| chr2  | 157875633 | 157876207 | 1.5 | ATZ  | Rprd1b              | Tti1          | 40537   | 2010009K17Rik | 19893   |
| chr1  | 194762231 | 194763370 | 1.5 | ATZ  | Syt14               | Sertad4       | 80285   | Diexf         | 167227  |
| chr6  | 116207533 | 116208349 | 1.5 | ATZ  | Fam21               | Tmcc1         | 64141   | Zfand4        | 5904    |
| chrX  | 166434738 | 166436029 | 1.5 | Cont | NA                  | Mid1          | 6009    | NA            | NA      |
| chr1  | 121665481 | 121665873 | 1.5 | ATZ  | Ptpn4               | Epb4.1i5      | 119904  | Tmem177       | 138605  |
| chr7  | 96427465  | 96427844  | 1.5 | ATZ  | Tmem135             | Rab38         | 787383  | Fzd4          | 125032  |
|       |           |           |     |      |                     |               |         |               |         |
|       |           |           |     |      |                     |               |         |               |         |
|       |           |           |     |      |                     |               |         |               |         |
|       |           |           |     |      |                     |               |         |               |         |
|       |           |           |     |      |                     |               |         |               |         |

## supplemental file 3. Differential peaks located nearby ncRNAs

| Chr   | start     | end       | FC   | Overlap_IncRNA                       | upstream_IncRNA    | Downstream_IncRNA  |
|-------|-----------|-----------|------|--------------------------------------|--------------------|--------------------|
| chr2  | 80475903  | 80476675  | 1.64 | NA                                   | kinorura           | ENSMUSG00000087061 |
| chr5  | 39697186  | 39697578  | 1.71 | NA                                   | foflu              | yohuse             |
| chr6  | 116207533 | 116208349 | 1.51 | NA                                   | D6Wsu116e          | Anubl1             |
| chr7  | 36323530  | 36324115  | 1.54 | NA                                   | 2410004F06Rik      | ENSMUSG00000084801 |
| chr11 | 19781164  | 19782366  | 1.58 | NA                                   | rakuhe             | LOC665868          |
| chr12 | 102287546 | 102288352 | 1.80 | NA                                   | Smek1              | fupu               |
| chr13 | 112274352 | 112277228 | 1.53 | NA                                   | ENSMUSG00000086201 | Gpbp1              |
| chr17 | 53336301  | 53336496  | 1.57 | NA                                   | LOC668506          | yukuya             |
| chr4  | 41812954  | 41813176  | 1.63 | NA                                   | Ccl19-ps1          | RP23-304I1.3       |
| chr1  | 73068851  | 73070239  | 1.55 | NA                                   | weesny             | 1700027A15Rik      |
| chr1  | 136444842 | 136447126 | 1.59 | NA                                   | dusnu              | namiyora           |
| chr1  | 188748980 | 188752013 | 1.52 | NA                                   | ENSMUSG00000090488 | LOC666832          |
| chr10 | 87824865  | 87826154  | 1.63 | NA                                   | 1200002N14Rik      | shyty              |
| chr15 | 81235364  | 81239268  | 1.53 | Xpnpep3 yatemi                       | vular              | Rbx1               |
| chr17 | 6493079   | 6493317   | 2.24 | NA                                   | neriya             | LOC100040531       |
| chr19 | 43462819  | 43464289  | 1.56 | NA                                   | LOC545291          | tureru             |
| chr6  | 101148078 | 101149384 | 1.55 | ENSMUSG00000091352<br>tisisa         | tasisa             | ratusu             |
| chr8  | 106126477 | 106127420 | 1.54 | NA                                   | Gm20073            | 4933400L20Rik      |
| chr8  | 109981247 | 109983205 | 1.51 | NA                                   | hotetu             | choywor            |
| chr9  | 18201386  | 18202465  | 1.60 | NA                                   | husone             | Naalad2            |
| chr9  | 54113404  | 54116365  | 1.53 | NA                                   | Elmod1             | Gldnos             |
| chr1  | 30910083  | 30910617  | 1.88 | Phf3                                 | tahurora           | slasnar            |
| chr1  | 61896744  | 61898503  | 1.58 | huhorora                             | hahorora           | nersnu             |
| chr1  | 72688411  | 72689129  | 1.51 | sohorora                             | skeysney           | Rpl37a             |
| chr1  | 142551975 | 142553020 | 1.50 | 4930590L20Rik                        | foysnu             | ENSMUSG00000089418 |
| chr1  | 163826944 | 163828064 | 1.57 | tonarora                             | AI848100           | 2810442N19Rik      |
| chr1  | 178683009 | 178684995 | 1.60 | Cep170 yuhayura mahayura<br>sanirora | tonirora           | ENSMUSG00000084749 |
| chr10 | 66651827  | 66652297  | 1.55 | Jmjd1c                               | toytey             | wutey              |
| chr11 | 52001398  | 52001672  | 1.60 | ENSMUSG00000087101                   | ENSMUSG00000092028 | nihoho             |
| chr11 | 72423270  | 72423799  | 1.65 | Ube2g1                               | zoyrar             | wasoho             |
| chr12 | 84039774  | 84041685  | 1.52 | 1700085C21Rik                        | wanahi             | plorpoi            |
| chr13 | 20296341  | 20297626  | 1.56 | Elmo1                                | chorny             | foymoy             |
| chr13 | 76408015  | 76408452  | 1.64 | nehumo                               | AK129128           | kanamo             |
| chr13 | 99632264  | 99634279  | 1.55 | Tnpol                                | wawnoy             | tirahi             |
| chr14 | 8722714   | 8725405   | 1.54 | 1700110I01Rik                        | kuromu             | Flnb               |
| chr14 | 8949459   | 8950279   | 1.63 | 1700110I01Rik                        | Rpp14              | Pdhh               |
| chr14 | 20236574  | 20237182  | 1.52 | 1700110I01Rik                        | smorler            | LOC100039441       |
| chr14 | 20237394  | 20237681  | 1.64 | 1700110I01Rik                        | smorler            | LOC100039441       |

|       |           |           |      |                                          |                        |                              |
|-------|-----------|-----------|------|------------------------------------------|------------------------|------------------------------|
| chr14 | 70008610  | 70009670  | 2.11 | ENSMUSG00000085092<br>romimu             | Entpd4                 | ENSMUSG000000852<br>43       |
| chr14 | 76836063  | 76838028  | 1.51 | Gm19597                                  | kawley                 | 4930444M15Rik                |
| chr14 | 119133727 | 119134083 | 1.51 | rimemu                                   | 1700044C05Rik          | snumey                       |
| chr15 | 20654789  | 20655616  | 1.54 | sahama                                   | LOC100040265           | nasuma                       |
| chr15 | 46453727  | 46455632  | 1.58 | 4930548G14Rik                            | wahuma                 | skerla                       |
| chr15 | 79152586  | 79153554  | 1.51 | Pla2g6                                   | Gm10863                | Csnk1e                       |
| chr16 | 96682408  | 96683439  | 1.69 | sawjey                                   | Dscr2                  | hitiyu                       |
| chr17 | 6429271   | 6429489   | 1.77 | LOC547127<br>ENSMUSG00000091795          | huriya                 | Dynlt1                       |
| chr17 | 6476411   | 6476645   | 1.82 | ENSMUSG00000091795                       | LOC547127              | neriya                       |
| chr17 | 54506433  | 54507634  | 1.51 | 1700025K24Rik                            | tukuya                 | duger                        |
| chr17 | 70271616  | 70273437  | 1.55 | tokaro                                   | ENSMUSG000000885<br>81 | soroyu                       |
| chr17 | 71663816  | 71665047  | 1.50 | ENSMUSG00000085916<br>kakaro             | sokaro                 | Ndc80                        |
| chr18 | 29601900  | 29602366  | 1.56 | 4930578E11Rik<br>4930527G23Rik           | namure                 | numure                       |
| chr18 | 45861158  | 45861734  | 1.69 | tumere                                   | tururo                 | gygu                         |
| chr18 | 64435266  | 64437459  | 1.52 | St8sia3os                                | temore                 | Fech                         |
| chr2  | 14438803  | 14440215  | 1.59 | ENSMUSG00000084901<br>susirara           | Stam                   | hiharira                     |
| chr2  | 78106181  | 78107423  | 1.54 | Gm14461                                  | LOC667920              | OTTMUSG000000167<br>03       |
| chr2  | 171059519 | 171060824 | 1.82 | ENSMUSG00000084829<br>ENSMUSG00000086613 | ENSMUSG000000848<br>18 | 1700028P15Rik                |
| chr3  | 40420089  | 40420643  | 1.58 | 1700017G19Rik                            | fapley                 | Intu                         |
| chr3  | 84183136  | 84183927  | 1.74 | 4930565D16Rik                            | flerpler               | Arfip1                       |
| chr3  | 91944426  | 91947263  | 1.51 | A030004J04Rik                            | kleypler               | LOC619984                    |
| chr4  | 154497273 | 154499951 | 1.54 | Morn1                                    | Pank4                  | Ski                          |
| chr5  | 22196284  | 22197114  | 1.55 | LOC668232<br>ENSMUSG00000087558          | horeki                 | sleeflu                      |
| chr5  | 38734483  | 38736468  | 1.52 | 4930487D11Rik                            | yahuse                 | Wdr1                         |
| chr5  | 99931672  | 99932974  | 1.61 | A930011G23Rik                            | kenuse                 | rinese                       |
| chr6  | 8470054   | 8471999   | 1.53 | Gm16039                                  | A430035B10Rik          | soresi                       |
| chr6  | 40877973  | 40878730  | 1.70 | 1700074P13Rik                            | totesi                 | LOC100039790                 |
| chr6  | 127749306 | 127749457 | 1.65 | fushey                                   | Parp11                 | soyblo                       |
| chr6  | 135609075 | 135610578 | 1.74 | susesa                                   | sisesa                 | geyshey                      |
| chr7  | 31946862  | 31947971  | 1.51 | Gm10640                                  | ENSMUSG000000854<br>58 | borchee                      |
| chr7  | 31948073  | 31948979  | 1.72 | Gm10640                                  | ENSMUSG000000854<br>58 | borchee                      |
| chr7  | 123138634 | 123140994 | 1.54 | sumite                                   | simite                 | EG668479and1110004<br>F10Rik |
| chr8  | 27193113  | 27195987  | 1.54 | 1700047A11Rik                            | Hook3                  | kehati                       |
| chr8  | 37237878  | 37239551  | 1.50 | hoseta                                   | huseta                 | 6430573F11Rik                |
| chr8  | 46680457  | 46682056  | 1.63 | LOC100861925<br>ENSMUSG00000084954       | mituti                 | ENSMUSG000000886<br>29       |
| chr8  | 60007688  | 60008195  | 1.64 | Galnt7                                   | husota                 | Gm2921                       |
| chr8  | 66190792  | 66191168  | 2.23 | tisota                                   | BC013672               | tusota                       |

|       |           |           |      |                                                          |                    |                    |
|-------|-----------|-----------|------|----------------------------------------------------------|--------------------|--------------------|
| chr9  | 41219401  | 41220623  | 1.52 | 3110039I08Rik                                            | kemone             | D230004N17Rik      |
| chr9  | 104058978 | 104060633 | 1.52 | korvaw                                                   | DnaJ.0             | nahone             |
| chr9  | 118295966 | 118296323 | 1.51 | parvaw                                                   | povaw              | 4933432G23Rik      |
| chr1  | 174105806 | 174106269 | 1.82 | Wdr42a                                                   | sumuyura           | ninirora           |
| chr10 | 66648327  | 66649130  | 1.62 | Jmjd1c                                                   | toytey             | wutey              |
| chr10 | 69070299  | 69070962  | 2.06 | namonu                                                   | tiruni             | Ank3               |
| chr10 | 87826393  | 87828103  | 1.62 | shyty                                                    | 1200002N14Rik      | ENSMUSG00000091432 |
| chr11 | 101983975 | 101985159 | 1.74 | LOC666411                                                | mosey              | snorar             |
| chr13 | 104613543 | 104614517 | 1.62 | Erbb2ip                                                  | harehi             | yohomo             |
| chr13 | 106679224 | 106679563 | 1.91 | mu homo                                                  | sorohi             | bleemoy            |
| chr14 | 24937827  | 24938301  | 1.64 | sneeler                                                  | heromu             | Dlg5               |
| chr14 | 69953593  | 69956310  | 1.81 | rumimu Gm16677 Entpd4                                    | 1700092C10Rik      | remimu             |
| chr14 | 104397145 | 104397593 | 1.79 | 4930432J09Rik namumu                                     | homumu             | moley              |
| chr14 | 124386474 | 124387683 | 1.51 | momemu 1700024B18Rik                                     | mememu             | neromu             |
| chr15 | 94721788  | 94722841  | 1.55 | Tmem117                                                  | Irak4              | LOC100043315       |
| chr16 | 73073139  | 73074918  | 1.52 | kunoyu                                                   | sakuyo             | nawjey             |
| chr17 | 22635875  | 22636124  | 1.53 | susiro                                                   | 1300003B13Rik      | numeya             |
| chr18 | 74019038  | 74020484  | 1.56 | perfey                                                   | mihare             | storgar            |
| chr18 | 77094514  | 77095422  | 1.76 | EG664805                                                 | tahare             | ryfey              |
| chr2  | 14440276  | 14440729  | 1.60 | ENSMUSG00000084901<br>susirara                           | Stam               | hiharira           |
| chr2  | 156217533 | 156217700 | 1.82 | 2900097C17Rik                                            | LOC669792          | nawarira           |
| chr4  | 19931320  | 19933069  | 1.50 | Ttpa                                                     | ENSMUSG00000086071 | ENSMUSG00000090934 |
| chr4  | 146772593 | 146772876 | 1.55 | ENSMUSG00000084976<br>ENSMUSG00000091833<br>LOC100043100 | LOC666581          | OTTMUSG00000010671 |
| chr6  | 6243671   | 6244169   | 1.66 | ENSMUSG00000093482                                       | Slc25a13           | hirusi             |
| chr8  | 51601691  | 51602594  | 1.77 | misota                                                   | Gm2516             | mawwor             |
| chr8  | 80149017  | 80149879  | 1.56 | 1700092C02Rik                                            | ENSMUSG00000091247 | tukata             |
| chr9  | 77655868  | 77656207  | 1.82 | fawvaw                                                   | farvaw             | Ick                |
| chr9  | 83137753  | 83139451  | 1.64 | hahene                                                   | govaw              | murita             |
| chr9  | 122560789 | 122561878 | 1.88 | ENSMUSG00000086476<br>9530059O14Rik                      | monine             | reevaw             |
| chr1  | 36949934  | 36950875  | 1.61 | Tmem131                                                  | EG623414           | rarsny             |
| chr1  | 53026378  | 53028680  | 1.62 | 1700019D03Rik                                            | sehayara           | seherora           |
| chr1  | 53028782  | 53030459  | 1.52 | 1700019D03Rik                                            | sehayara           | seherora           |
| chr1  | 73070386  | 73075293  | 1.55 | 1700027A15Rik                                            | weesny             | wersny             |
| chr1  | 78736788  | 78737776  | 1.52 | zeysny                                                   | yonarora           | hekayara           |
| chr1  | 80443685  | 80444454  | 1.57 | 1700016L21Rik                                            | veenor             | hikiyara           |
| chr1  | 139862747 | 139865400 | 1.61 | ratirora                                                 | ramoyora           | Ptprc              |
| chr10 | 62709337  | 62710692  | 1.50 | komanu                                                   | suty               | rominu             |
| chr10 | 67781298  | 67784930  | 1.53 | Gm19746 4930545H06Rik<br>nuruni                          | LOC100040136       | noruni             |
| chr10 | 112163896 | 112165736 | 1.56 | tayani                                                   | noyani             | gleety             |
| chr11 | 14076142  | 14079835  | 1.51 | ENSMUSG00000085452                                       | hisoh              | 1700046C09Rik      |
| chr11 | 19776886  | 19780305  | 1.58 | rakuhe                                                   | ferrer             | LOC665868          |

|       |           |           |                                      |                             |                    |
|-------|-----------|-----------|--------------------------------------|-----------------------------|--------------------|
| chr11 | 54342222  | 54345178  | 1.58 Rapgef6                         | haniho                      | Cdc42se2           |
| chr11 | 113033560 | 113034397 | 1.58 2610035D17Rik                   | nonohe                      | 4732490B19Rik      |
| chr11 | 114285677 | 114289258 | 1.53 4932435O22Rik                   | ENSMUSG00000075431          | swyrrar            |
| chr12 | 92206866  | 92209910  | 1.52 ENSMUSG00000092100tenahi        | LOC100039295                | ENSMUSG00000084566 |
| chr13 | 37806834  | 37809620  | 1.91 momomo                          | karmoy                      | blarno             |
| chr13 | 56697328  | 56699001  | 1.55 ruhimo                          | AU042651                    | ENSMUSG00000092091 |
| chr13 | 59662098  | 59662989  | 1.60 A230056J06Rik                   | hoheha                      | Mak10              |
| chr13 | 81118403  | 81120800  | 1.56 ENSMUSG000000852669330111N05Rik | LOC100043074                | LOC218368          |
| chr13 | 95317580  | 95319459  | 1.65 chymoy                          | nokeha                      | chomoy             |
| chr13 | 112277401 | 112278213 | 1.66 Gpbp1                           | regulation of transcription | ENSMUSG00000085634 |
| chr14 | 15942542  | 15943519  | 1.67 1700110I01Rik reyamu            | ruyamu                      | ENSMUSG00000090616 |
| chr14 | 39709772  | 39712153  | 1.57 Nrg3os                          | heyumu                      | niyumu             |
| chr14 | 60109522  | 60110640  | 1.56 Cab39l                          | kumome                      | Cdadcl             |
| chr14 | 69945546  | 69947016  | 1.61 rumimu Gm16677                  | 1700092C10Rik               | Entpd4             |
| chr14 | 69947094  | 69948831  | 1.74 rumimu Gm16677                  | 1700092C10Rik               | Entpd4             |
| chr14 | 106883569 | 106887643 | 1.60 1700128A07Rik                   | mawley                      | LOC668752          |
| chr15 | 9083841   | 9086297   | 1.70 Skp2                            | 1110020G09Rik               | Lmbrd2             |
| chr15 | 46154816  | 46157698  | 1.52 kohima 1700022A22Rik            | siyami                      | wahuma             |
| chr15 | 77258312  | 77258667  | 1.52 nahema                          | glerker                     | 1700025B11Rik      |
| chr16 | 52830168  | 52831144  | 1.63 LOC667895                       | 4930404A05Rik               | niteyo             |
| chr16 | 76121327  | 76124571  | 1.52 4930578N18Rik                   | Samsn1                      | Nrip1              |
| chr16 | 77351769  | 77352351  | 1.52 2810055G20Rik                   | ritayu                      | yarima             |
| chr16 | 77352432  | 77353915  | 1.58 2810055G20Rik                   | ritayu                      | yarima             |
| chr16 | 78693995  | 78696231  | 1.56 4930570E03Rik                   | 4930478L05Rik               | yaruma             |
| chr17 | 6429542   | 6429778   | 2.63 LOC547127                       | huriya                      | Dynlt1             |
| chr17 | 6475846   | 6476233   | 2.18 ENSMUSG00000091795              | LOC547127                   | neriya             |
| chr17 | 6489260   | 6489496   | 1.93 ENSMUSG00000091795              | LOC547127                   | neriya             |
| chr17 | 6491637   | 6491975   | 2.47 ENSMUSG00000091795neriya        | LOC547127                   | LOC100040531       |
| chr17 | 6492231   | 6492684   | 2.38 ENSMUSG00000091795neriya        | LOC547127                   | LOC100040531       |
| chr17 | 29618846  | 29621276  | 1.54 tasuro                          | tisuro                      | Pim1               |
| chr17 | 29621499  | 29625073  | 1.51 ENSMUSG00000087551              | tisuro                      | Pim1               |
| chr18 | 33092226  | 33094945  | 1.57 ENSMUSG00000087447              | 4930455D15Rik               | sosere             |
| chr18 | 67939131  | 67940566  | 1.56 4930549G23Rik                   | B430212C06Rik               | ENSMUSG00000092977 |
| chr18 | 68632270  | 68632851  | 1.62 komore                          | D18Erttd653e                | sheegar            |
| chr19 | 43218118  | 43218916  | 1.62 LOC545291                       | verfar                      | tireru             |
| chr2  | 105316048 | 105317564 | 1.53 ENSMUSG00000086764              | Wt1os                       | Pax6os1            |
| chr2  | 113547277 | 113549881 | 1.54 4930533B01Rik                   | dosly                       | deesly             |
| chr2  | 150953111 | 150953355 | 1.62 4921509C19Rik                   | ENSMUSG00000085805          | ENSMUSG00000087337 |

|      |           |           |      |                                     |                          |                                      |
|------|-----------|-----------|------|-------------------------------------|--------------------------|--------------------------------------|
| chr2 | 151257312 | 151257829 | 1.53 | 4921509C19Rik<br>ENSMUSG00000087495 | kekorara                 | ENSMUSG000000868<br>00 4930556L07Rik |
| chr2 | 169213184 | 169216002 | 1.52 | vorsly                              | ENSMUSG000000853<br>69   | ENSMUSG000000853<br>50               |
| chr2 | 180448493 | 180449788 | 1.61 | 2310003C23Rik                       | Dido1                    | ENSMUSG000000861<br>66               |
| chr3 | 35560908  | 35562973  | 1.55 | LOC625963                           | Gm3143                   | dopley                               |
| chr4 | 10724045  | 10725306  | 1.51 | 1700123O12Rik                       | homeki                   | Mir3471-1                            |
| chr4 | 22864951  | 22866296  | 1.63 | ENSMUSG00000028244                  | tusoki                   | komeki                               |
| chr4 | 37196302  | 37197507  | 2.02 | ENSMUSG00000086026                  | LOC545600                | heruko                               |
| chr5 | 6412462   | 6414852   | 1.52 | rohise                              | LOC546854                | kasise                               |
| chr5 | 15217817  | 15218108  | 6.16 | Speer7-ps1                          | nekoka                   | 4930519H02Rik                        |
| chr5 | 15219200  | 15219659  | 1.54 | Speer7-ps1                          | nekoka                   | 4930519H02Rik                        |
| chr5 | 39992854  | 39995206  | 1.57 | mahuse                              | ENSMUSG000000878<br>45   | soraso                               |
| chr5 | 88406205  | 88407873  | 1.64 | 1700066N21Rik                       | 2310003L06RikandSmr<br>1 | henuse                               |
| chr5 | 88407937  | 88410039  | 1.58 | 1700066N21Rik                       | 2310003L06RikandSmr<br>1 | henuse                               |
| chr6 | 20918577  | 20920432  | 1.61 | zersher zeysher                     | romusi                   | hemusi                               |
| chr6 | 29229398  | 29232014  | 1.52 | chusher                             | snorshoy                 | choshier                             |
| chr6 | 40878942  | 40880372  | 1.65 | 1700074P13Rik                       | totesi                   | LOC100039790                         |
| chr6 | 42963463  | 42964676  | 1.55 | bleysher                            | BC011487                 | matesa                               |
| chr6 | 85851209  | 85852966  | 1.59 | 1700019G17Rik                       | hosasa                   | Nat8b                                |
| chr7 | 46570637  | 46571072  | 1.67 | neyate                              | 1700010N08Rik            | skeychee                             |
| chr7 | 134601623 | 134602216 | 1.54 | B130055M24Rik                       | fushaw                   | 1700008J07Rik                        |
| chr8 | 9130192   | 9132700   | 1.62 | 4933430N04Rik                       | nesita                   | beywor                               |
| chr9 | 13105243  | 13106913  | 1.64 | hamene 4930568E12Rik                | tasane                   | weevee                               |
| chr9 | 67271644  | 67272791  | 1.59 | Tln2                                | hihune                   | beevaw                               |
| chr9 | 106527235 | 106528105 | 1.57 | tihone                              | Pcbp4                    | ENSMUSG000000883<br>17               |
| chrX | 43644518  | 43646823  | 1.62 | 4930515L19Rik                       | karda                    | shadu                                |
| chr5 | 99936364  | 99941799  | 1.60 | A930011G23Rik                       | kenuse                   | rinese                               |
